1 Temporal and genomic analysis of additive genetic  
2 variance in breeding programmes

3 Letícia A. de C. Lara<sup>1</sup>, Ivan Pocrnic<sup>1</sup>, R. Chris Gaynor<sup>1</sup>, and Gregor  
4 Gorjanc<sup>1</sup>

5 <sup>1</sup>The Roslin Institute and Royal (Dick) School of Veterinary Studies, The  
6 University of Edinburgh, Edinburgh, UK

7 **Corresponding author:**

8 Lara, L. A. C.: The Roslin Institute, The University of Edinburgh, Easter Bush Campus,  
9 Midlothian, Edinburgh, EH25 9RG, UK. Phone: +44 0131 651 9100. E-mail: llara@ed.ac.uk

10  
11 **Keywords:** genetic diversity; genetic parameters; variance; selection

## 12 Abstract

13 This study demonstrates a framework for temporal and genomic analysis of additive genetic  
14 variance in a breeding programme. Traditionally we used specific experimental designs to es-  
15 timate genetic variance for a specific group of individuals and a general pedigree-based model  
16 to estimate genetic variance for pedigree founders. However, with the pedigree-based model  
17 we can also analyse temporal changes in genetic variance by summarising sampled realisa-  
18 tions of genetic values from a fitted model. Here we extend this analysis to a marker-based  
19 model and build a framework for temporal and genomic analyses of genetic variance. The  
20 framework involves three steps: (i) fitting a marker-based model to data, (ii) sampling real-  
21 isations of marker effects from the fitted model and for each sample calculating realisations  
22 of genetic values, and (iii) calculating variance of the sampled genetic values by time and  
23 genome partitions. Genome partitions enable estimation of contributions from chromosomes  
24 and chromosome pairs and genic and linkage-disequilibrium variances. We demonstrate the  
25 framework by analysing data from a simulated breeding programme involving a complex  
26 trait with additive gene action. We use the full Bayesian and empirical Bayesian approaches  
27 to account for the uncertainty due to model fitting. We also evaluate the use of principal  
28 component approximation. Results show good concordance between the simulated and esti-  
29 mated variances for temporal and genomic analyses and give insight into genetic processes.  
30 For example, we observe reduction of genic variance due to selection and drift and buildup of  
31 negative linkage-disequilibrium (the Bulmer effect) due to directional selection. In this study  
32 the popular empirical Bayesian approach estimated the variances well but it underestimated  
33 uncertainty of the estimates. The principal components approximation biases estimates, in  
34 particular for the genic variance. This study gives breeders a framework to analyse genetic  
35 variance and its components in different stages of a programme and over time.

## 36 1 Introduction

37 In this study we analyse temporal and genomic trends of additive genetic variance in different  
38 stages of a breeding programme. Genetic variance is one of the critical parameters in a  
39 breeding programme because it determines the potential for selection (Lush, 1937; Falconer  
40 and Mackay, 1996; Lynch and Walsh, 1998; Walsh and Lynch, 2018). Estimation of genetic  
41 variance has therefore received considerable attention in the literature (Lynch and Walsh,  
42 1998; Walsh and Lynch, 2018). Most of the attention in literature is on statistical models and  
43 approaches for estimation. Surprisingly, far less attention has been given to temporal trends  
44 in genetic variance, even though such trends indicate sustainability of a breeding programme.  
45 Recent ability to observe genomes at scale has renewed interest in analysing genetic variance.  
46 In this study we show that with a combination of established and new approaches we can  
47 use a simple framework to analyse temporal and genomic trends in genetic variance in a  
48 breeding programme.

49 Estimation of genetic variance in breeding programmes has a long history and a recent  
50 revival with the advent of genomic information. Historically, genetic variance was estimated  
51 with an analysis of variance (ANOVA) methods in tailored experimental designs ranging  
52 from simple parent-offspring or sib groups to North Carolina and diallel designs (Falconer  
53 and Mackay, 1996; Lynch and Walsh, 1998; Bernardo, 2002; Awata *et al.*, 2018). With  
54 these designs we partition phenotypic variance into variance between and within groups and  
55 “translate” these components into genetic variance based on expected genetic relationships  
56 within and between groups. Animal breeders have soon moved from experimental designs  
57 to a general pedigree-based model to analyse their observational data (Henderson, 1976).  
58 Plant breeders generally analyse experimental data and have only recently started to adopt  
59 the pedigree-based model (Oakey *et al.*, 2006, 2007; Piepho *et al.*, 2008). There are many  
60 logistical and conceptual reasons for this. One reason is that with the pedigree-based model

61 we estimate genetic variance between the founders of a pedigree (Sorensen and Kennedy,  
62 1984; Kennedy *et al.*, 1988), while genetic variance between their descendants is arguably  
63 more relevant for breeding (Piepho *et al.*, 2008). The advent of genomic information revived  
64 interest in the estimation of genetic variance and spurred active development of genome-  
65 based models (Bernardo, 1994, 1996; Meuwissen *et al.*, 2001; VanRaden, 2008). The genome-  
66 based model replaces expected relationships from the experimental designs or pedigree with  
67 realised relationships measured by marker genotypes. The estimate of genetic variance from  
68 the genome-based model pertains to all genotyped individuals (Hayes *et al.*, 2009) and can  
69 be obtained using either a genome-based model with genetic values or a genome-based model  
70 with marker effects (marker-based model) (Strandén and Garrick, 2009). We note though  
71 that the resulting “genomic variance” is at odds with the quantitative genetics definition of  
72 genetic variance (Gianola *et al.*, 2009; de los Campos *et al.*, 2015). Specifically, the genome-  
73 based model is defined with the (scaled) variance of marker effects and not with genetic  
74 variance. Further, markers are not necessarily quantitative trait loci affecting phenotype.  
75 Both of these points lead to model “misspecification” in a sense that model parameters do  
76 not represent quantitative genetic parameters (Gianola *et al.*, 2009; de los Campos *et al.*,  
77 2015). We will come back to this note repeatedly.

78 In parallel to the development of data sources and corresponding statistical models, there  
79 has been active development in statistical and computational approaches for the estimation  
80 of genetic variance. The three most used are method of moments, likelihood and Bayesian  
81 approach. The method of moments that is used with the ANOVA is computationally simple  
82 but can yield biased estimates outside of the parameter space. It also does not generalise to  
83 unbalanced data. The likelihood approach has better statistical properties than the method  
84 of moments (Sorensen and Gianola, 2007). With the likelihood approach we specify a prob-  
85 ability distribution for observed data and find the most likely value of model parameters  
86 that would give rise to the observed data. Use of this approach to estimate genetic vari-

87 ances is extensively described in Meyer (1985); Meyer and Hill (1997); Smith *et al.* (2005);  
88 Thompson *et al.* (2005); Thompson (2019). The Bayesian approach improves the likelihood  
89 approach in two ways. First, it incorporates prior knowledge (distribution) for all model pa-  
90 rameters (means and variances), which can improve estimation (Sorensen and Gianola, 2007;  
91 Hem *et al.*, 2020). Second, it treats all model parameters in a probabilistically consistent  
92 manner such that estimation uncertainty is propagated to all estimated model parameters  
93 (Sorensen and Gianola, 2007). The full probabilistic treatment makes the Bayesian approach  
94 computationally more demanding than the likelihood approach. We commonly handle the  
95 computational demand by using an empirical Bayesian approach where we first estimate  
96 most likely values for variance parameters and conditional on these estimate other model  
97 parameters (Efron, 1996; Sorensen and Gianola, 2007). In the marker-based model, the em-  
98 pirical Bayesian approach estimates model variances from the data at hand and conditional  
99 on these estimates all marker effects jointly to account for uncertainty of estimating marker  
100 effects (uncertainty of estimating model variances is ignored). The full Bayesian approach  
101 accounts for uncertainty in estimating model variances and marker effects. The full Bayesian  
102 approach is commonly approached with computationally intensive sampling methods such  
103 as Monte Carlo Markov Chain (MCMC) (Gilks *et al.*, 1995; Brooks *et al.*, 2011). MCMC on  
104 genome-based models with many individuals or markers can be time-consuming. To this end  
105 various dimensionality-reduction approaches have been proposed, for example, singular value  
106 decomposition (SVD) of marker genotypes where we fit a small number of principal compo-  
107 nents that capture majority of variance in marker genotypes (Tusell *et al.*, 2013; Ødegård  
108 *et al.*, 2018).

109 Variances from pedigree and genome-based models do not inform about temporal and  
110 genomic trends in genetic variance because they pertain to a specific group of individuals  
111 and encompass the whole genome (Sorensen and Kennedy, 1984; Kennedy *et al.*, 1988; Hayes  
112 *et al.*, 2009). However, these models can be used for temporal and genomic analyses of

113 genetic variance with some post-processing. Sorensen *et al.* (2001) showed how to analyse the  
114 temporal trend in genetic variance. They fitted a pedigree-based model and inferred genetic  
115 variance for several time partitions by sampling realisations of genetic values from the fitted  
116 model and calculating variance of the realisations partitioned in time groups. They used  
117 the Bayesian approach and MCMC, but their concept is general and can be used with other  
118 statistical and computational approaches. The important distinction here is between model  
119 fitting to estimate statistical/model parameters and post-processing to estimate quantitative  
120 genetics parameters. This distinction enables flexibility to fit a generic model, for example  
121 LASSO (Tibshirani, 1996), and to estimate quantitative genetics parameters from post-  
122 processing results of the model. This gives a potential to (partially) address the issue of  
123 “misspecification” with genome-based models (Gianola *et al.*, 2009; de los Campos *et al.*,  
124 2015). Partially, because we need enough markers to capture all variation at quantitative  
125 trait loci. Lehermeier *et al.* (2017) used the same approach with the marker-based model  
126 and analysed the contribution of linkage-disequilibrium to genetic variance. Recently, Allier  
127 *et al.* (2019) also used the marker-based model on data from a maize breeding programme  
128 to infer trends in genetic mean and genetic variance as well as the contribution of allele  
129 diversity (genic variance) and of linkage-disequilibrium to genetic variance (Bulmer, 1971;  
130 Lynch and Walsh, 1998; Walsh and Lynch, 2018).

131 The aim of this work is to i) build and validate a flexible framework based on the work  
132 of Sorensen *et al.* (2001), Lehermeier *et al.* (2017) and Allier *et al.* (2019), ii) show how to  
133 evaluate temporal and genomic analysis of additive genetic variance in different stages of a  
134 breeding programme and iii) indicate genetic processes that change genome. We also show  
135 how different statistical approaches affect the results. To this end we have validated our work  
136 with a simulated breeding programme, used a marker-based model to estimate marker effects  
137 and based on these estimated temporal and genomic trends in additive genetic variance.  
138 The results show good concordance between the simulated and estimated variances and

139 give insight into genetic processes. In this study the popular empirical Bayesian approach  
140 estimated variances well but it underestimated uncertainty of the estimates. The principal  
141 components approximation biased estimates, in particular for the genic variance.

## 142 **2 Materials and Methods**

143 In this section we present study material and methods in five parts: (1) simulation of a  
144 breeding programme where we generate true values and observed data, (2) temporal and  
145 genomic analysis of genetic variance where we demonstrate the framework assuming we  
146 know the true quantitative trait locus genotypes and their effects, (3) statistical analysis of  
147 observed data where we describe marker-based model fitted to observed data, (4) statistical  
148 and computational approaches to estimate marker effects, genetic values and variances, and  
149 (5) software implementation.

### 150 **2.1 Breeding programme simulation**

151 We simulated an entire wheat breeding programme considering additive genetic architecture  
152 for a quantitative trait. We have performed one simulation replicate for most analyses to  
153 focus on one dataset, but we also evaluated consistency of estimates for a subset of analyses  
154 on 10 simulation replicates. We followed a breeding programme described by Gaynor *et al.*  
155 (2017) with 21 years of a conventional phenotypic selection for yield (Fig. 1). We started with  
156 the simulation of whole-genome sequences for 21 chromosome pairs and extracted random  
157 600 biallelic single nucleotide polymorphisms (SNP) as markers per chromosome and random  
158 100 SNP as quantitative trait loci (QTL) per chromosome. We assumed that the 2,100 QTL  
159 had an additive effect on yield and sampled their effects from a normal distribution. We  
160 coded genotypes as 0 for reference homozygote, 1 for heterozygote and 2 for alternative  
161 homozygote. From the simulated whole-genome sequences, we created 70 inbred lines and

162 crossed them to generate 100 biparental populations. Each population had 100  $F_1$  that  
 163 had their genome doubled and planted in headrows (altogether 10,000). In the headrows  
 164 we visually evaluated the lines (trait heritability of 0.1) and advanced the best 500 into a  
 165 preliminary yield trial. In the preliminary yield trial we evaluated the lines in an unreplicated  
 166 trial (trait heritability of 0.2) and advanced the best 50 into an advanced yield trial. In the  
 167 advanced yield trial we evaluated the lines in a small multi-location replicated trial (trait  
 168 heritability of 0.5) and advanced the best 10 into an elite yield trial. In the elite yield trial we  
 169 evaluated the lines for two consecutive years in a large multi-location replicated trial (trait  
 170 heritability of 0.67) and released one variety. We used the best lines from the advanced and  
 171 elite yield trials as parents to start a new breeding cycle.

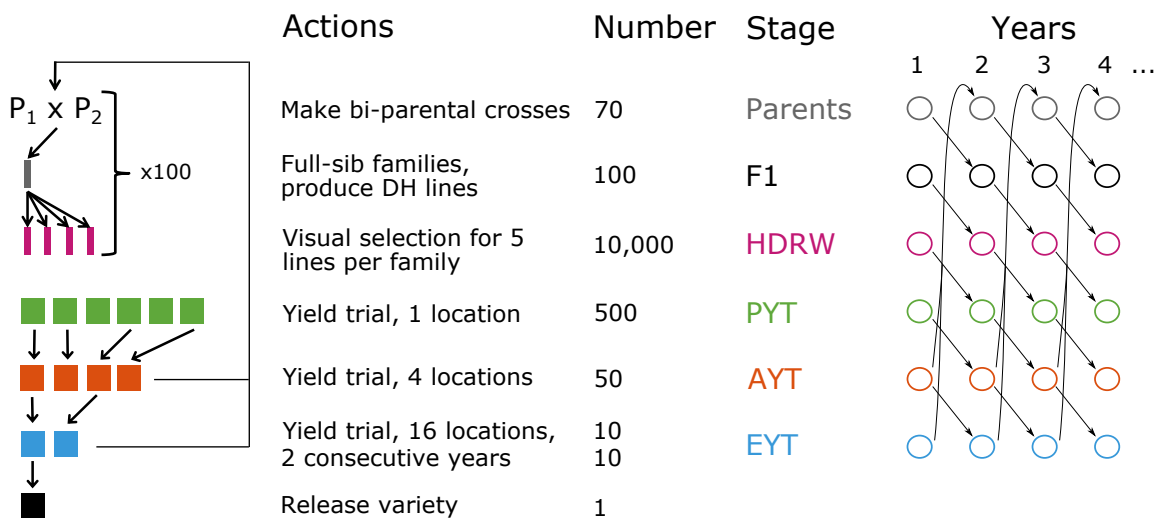

Figure 1: Simulated wheat breeding programme with parents,  $F_1$  progeny (F1), headrows (HDRW), preliminary yield trial (PYT), advanced yield trial (AYT), elite yield trial (EYT) and a released variety

172 Throughout the simulation we have saved phenotype and marker genotype data to gen-  
 173 erate a training population for genomic modelling. We did not use the genomic data in the  
 174 simulation of a breeding programme, but only saved it for the statistical analysis of tem-  
 175 poral and genomic trends of genetic variance. To this end, we have constructed a training  
 176 population that spanned the last 6 years of the simulation, from year 16 to 21. This training



177 population covered 3,070 lines with preliminary, advanced and elite yield trial phenotypes  
178 (altogether 3,420 phenotypes) and corresponding 10,500 marker genotypes.

## 179 **2.2 Temporal and genomic analysis of genetic variation**

180 Here we describe a flexible framework for temporal and genomic analysis of genetic variation,  
181 assuming that we know the QTL genotypes and their effects. In the following sub-sections,  
182 we estimate the temporal and genomic trends from observed phenotypes and marker geno-  
183 types and compare them to true values. The framework consists of four steps. First, we  
184 define whole-genome genetic values from QTL genotypes and their effects. Second, we par-  
185 tition individuals and their genetic values by time to calculate genetic variances over these  
186 time partitions for temporal analysis. Third, we partition whole-genome genetic values  
187 into chromosome and locus genetic values to calculate genetic variances and covariances  
188 over these genomic partitions for genomic analysis. This calculation involves three “layers”  
189 of variances: (a) total (whole-genome) genetic variance, (b) chromosome variances along-  
190 side linkage-disequilibrium covariances between chromosomes, and (c) locus genetic variances  
191 alongside locus linkage-disequilibrium covariances within chromosomes and locus linkage-  
192 disequilibrium covariances between chromosomes. Fourth, we combine temporal and genomic  
193 analyses.

194 First, let  $\mathbf{Q}$  be  $n_i \times n_q$  matrix of QTL genotypes for  $n_i$  individuals at  $n_q$  QTL and  $\boldsymbol{\alpha}$  be  
195  $n_q \times 1$  vector of QTL additive effects. Whole-genome genetic values of  $n_i$  individuals are a  
196 linear combination of QTL genotypes and their effects,  $\mathbf{a} = \mathbf{Q}\boldsymbol{\alpha}$ . Variance of these values is  
197 genetic variance,  $Var(\mathbf{a}) = \sum_{i=1}^n (a_i - \sum_{i=1}^n (a) / n)^2 / n$ . Note that this variance pertains to  
198 all  $n_i$  individuals and might not be an informative measure if these individuals span multiple  
199 stages and years of a breeding programme. In fact, any genetic trend or population structure  
200 will likely inflate this variance measure and mislead breeders in overestimating the amount  
201 of genetic variance. This is why we need temporal analysis of genetic variance.

202 Second, for the temporal analysis of genetic variance we partition the vector of genetic  
 203 values by time and calculate variance for each time partition. For example, assume that  
 204 individuals and their genetic values are ordered by time and that we partition them into  
 205 time groups as  $\mathbf{a}[1 : k]$ ,  $\mathbf{a}[(k + 1) : l]$ ,  $\mathbf{a}[(l + 1) : m]$ , ... Then the temporal analysis of genetic  
 206 variance is obtained by calculating variance for each time partition:  $\sigma_{a_1}^2 = Var(\mathbf{a}[1 : k])$ ,  
 207  $\sigma_{a_2}^2 = Var(\mathbf{a}[(k + 1) : l])$ ,  $\sigma_{a_3}^2 = Var(\mathbf{a}[(l + 1) : m])$ , ...

208 Third, for the genomic analysis of genetic variance we initially partition whole-genome  
 209 genetic values  $\mathbf{a}$  into an  $n_i \times n_c$  matrix of  $n_c$  chromosome genetic values  $\mathbf{A}_c$  such that  
 210  $\mathbf{a} = \sum_{c=1}^{n_c} \mathbf{A}_c[:, c]$ . We obtain these chromosome genetic values by summing locus genetic  
 211 values  $\mathbf{A}_q$  on each chromosome,  $\mathbf{A}_c[i, c] = \sum_l \mathbf{Q}[i, l] \boldsymbol{\alpha}[l]$  for  $l$  running over  $n_{l_c}$  QTL on a  
 212 chromosome  $c$ . Note that  $\mathbf{a} = \sum_{q=1}^{n_q} \mathbf{A}_q[:, q]$  and  $\mathbf{a} = \sum_{c=1}^{n_c} \sum_l \mathbf{A}_q[:, l]$  for  $l$  running over  
 213  $n_{l_c}$  QTL on a chromosome  $c$ . To calculate genetic variances over these genomic partitions  
 214 we will use the variance sum rule  $Var(x + y) = Var(x) + Var(y) + 2Cov(x, y)$  and the  
 215 variance product rule  $Var(xa) = Var(x)a^2$ . Partitioning of the genetic variance  $\sigma_a^2$  by  
 216 chromosomes gives the sum of  $n_c$  chromosome variances ( $\sigma_{a,c}^2$ ) and  $n_c * (n_c - 1)$  covariances  
 217 between chromosomes ( $\sigma_{(a,c')(a,c)}$ ):

$$Var(\mathbf{a}) = \sigma_a^2 = Var\left(\sum_c^{n_c} \mathbf{A}_c[:, c]\right) = \sigma_{a,1}^2 + \sigma_{a,2}^2 + \dots + \sigma_{a,n_c}^2 +$$

$$2 [\sigma_{(a,2)(a,1)} + \dots + \sigma_{(a,n_c)(a,n_c-1)}],$$

218 with covariances between chromosomes being between-chromosome linkage-disequilibrium  
 219 covariances (Fig. 2). Partitioning of a chromosome genetic variance  $\sigma_{a,c}^2$  by loci gives the  
 220 sum of  $n_{l_c}$  locus variances ( $\sigma_{a,c,l}^2$ ) and  $n_l * (n_l - 1)$  covariances between loci ( $\sigma_{(a,c,l')(a,c,l)}$ ):

$$\sigma_{a,c}^2 = \sigma_{a,c,1}^2 + \sigma_{a,c,2}^2 + \cdots + \sigma_{a,c,n_{lc}}^2 + 2 [\sigma_{(a,c,2)(a,c,1)} + \cdots + \sigma_{(a,c,n_{lc})(a,c,n_{lc}-1)}],$$

221 with locus variances being genic variances and covariances between loci being within-chromosome  
 222 linkage-disequilibrium covariances (Fig. 2) (Bulmer, 1971; Lynch and Walsh, 1998; Walsh  
 223 and Lynch, 2018). Locus genic variance is a function of variance in locus genotypes and their  
 224 allele substitution effect (using variance product rule):

$$\sigma_{a,c,l}^2 = Var(\mathbf{A}_q[:, l]) = Var(\mathbf{Q}[:, l]\boldsymbol{\alpha}[l]) = Var(\mathbf{Q}[:, l])\boldsymbol{\alpha}[l]^2,$$

225 where we emphasise that we do not use the common Hardy-Weinberg assumption of  $Var(\mathbf{Q}[:, l]) =$   
 226  $2p_l(1-p_l)$  with  $p_l$  being allele frequency. Instead, we advocate to calculate empirical variance  
 227 in observed locus genotypes,  $Var(\mathbf{Q}[:, l])$ . We will return to this point in discussion. Locus  
 228 linkage-disequilibrium covariance is a function of covariance between genotypes at two loci  
 229 and their allele substitution effects:

$$\sigma_{(a,c,l')(a,c,l)} = \boldsymbol{\alpha}[l']Cov(\mathbf{Q}[:, l'], \mathbf{Q}[:, l])\boldsymbol{\alpha}[l].$$

230 We can now partition the whole-genome genetic variance over chromosomes and loci as a  
 231 sum of genic variances, within-chromosome linkage-disequilibrium covariances, and between-  
 232 chromosome linkage-disequilibrium covariances (Fig. 2):

$$\begin{aligned} \sigma_a^2 &= \sum_{c=1}^{n_c} \sum_{l=1}^{n_{l_c}} \sigma_{a,c,l}^2 + && (= \text{genetic variance}) \quad (1) \\ &2 \sum_{c=1}^{n_c} \sum_{l=1}^{n_{l_c}-1} \sum_{l'=l+1}^{n_{l_c}} \sigma_{(a,c,l')(a,c,l)} + && (= \text{within-chromosome linkage-disequilibrium}) \\ &2 \sum_{c=1}^{n_c-1} \sum_{c'=c+1}^{n_c} \sum_{l=1}^{n_{l_c}} \sum_{l'=l}^{n_{l_c}} \sigma_{(a,c',l')(a,c,l)}. && (= \text{between-chromosome linkage-disequilibrium}) \end{aligned}$$

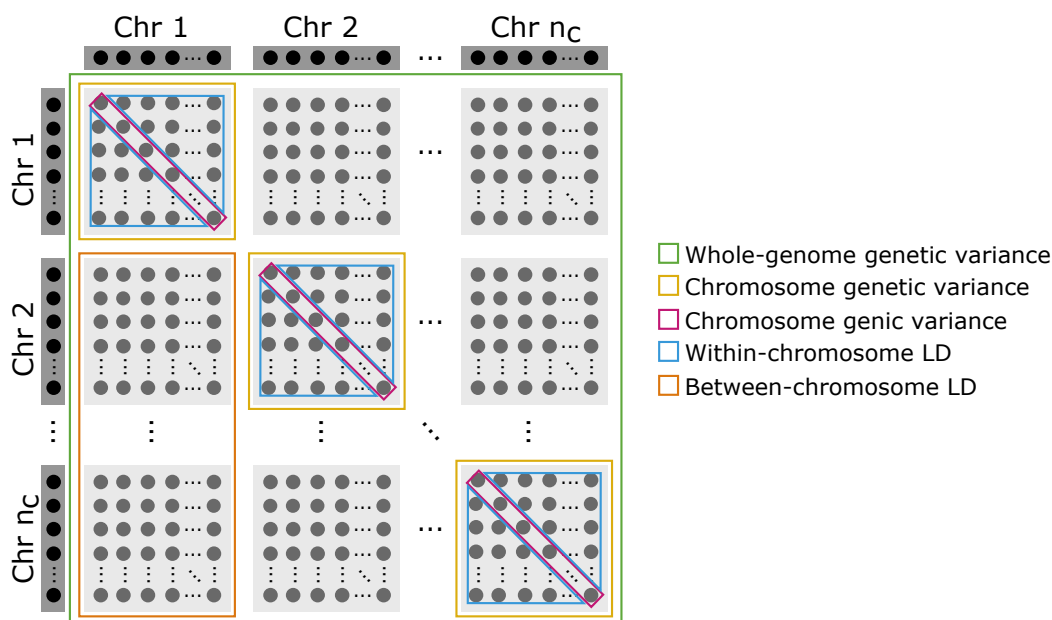

Figure 2: Illustrative scheme of genomic partitioning of whole-genome genetic variance by chromosomes and loci into genic, and within- and between-chromosome linkage-disequilibrium (LD) components

233 With  $n_l = 2,100$  QTL spread evenly over  $n_c = 21$  chromosomes, the total number of  
 234 locus combinations is  $n_l * n_l = 4,410,000$  and the total number of chromosome combi-  
 235 nations is  $n_c * n_c = 441$ . The framework partitions genetic variance into  $n_l = 2,100$  lo-  
 236 cus genic variances ( $n_c = 21$  chromosome genic variances),  $n_c * n_{l_c} * (n_{l_c} - 1) = 207,900$   
 237 locus within-chromosome linkage-disequilibrium covariances ( $n_c = 21$  chromosome within-  
 238 chromosome linkage-disequilibrium covariances), and  $n_l * n_l - n_c * n_{l_c} * n_{l_c} = 4,197,900$

239 locus between-chromosome linkage-disequilibrium covariances ( $n_c * n_c - n_c = 420$  chromo-  
240 some between-chromosome linkage-disequilibrium covariances). We emphasise these num-  
241 bers because we often hear colleagues saying that there is no or limited between-chromosome  
242 linkage-disequilibrium (due to the lack of physical linkage). However, selection and other  
243 genetic processes generate within- and between-chromosome linkage-disequilibrium (Bulmer,  
244 1971; Lynch and Walsh, 1998; Walsh and Lynch, 2018). Even if the between-chromosome  
245 linkage-disequilibrium covariances are small, there is a very large number of them and they  
246 can collectively have a sizeable effect on genetic variance as we show in results.

247 Fourth, for the joint temporal and genomic analysis, we perform genomic partitioning  
248 and variance calculations for individuals and their genetic values partitioned by time.

## 249 2.3 Statistical analysis of observed data

250 In the previous sub-section we assumed we know the QTL and their effects. In reality we  
251 observe phenotypes and marker genotypes and make inferences based on this information.  
252 To this end we fitted the marker-based model:

$$\mathbf{y} = \mathbf{X}\mathbf{b} + \mathbf{Z}\mathbf{W}\mathbf{m} + \mathbf{e}, \quad (2)$$

$$\mathbf{m} \sim N(\mathbf{0}, \mathbf{I}\sigma_m^2), \quad (3)$$

$$\mathbf{e} \sim N(\mathbf{0}, \mathbf{I}\sigma_e^2), \quad (4)$$

253 where,  $\mathbf{y}$  is an  $n_y \times 1$  vector of  $n_y$  phenotypic values,  $\mathbf{X}$  is an  $n_y \times n_b$  incidence matrix for  
254  $n_b$  intercept and year effects  $\mathbf{b}$ ,  $\mathbf{Z}$  is an  $n_y \times n_i$  incidence matrix for  $n_i$  lines whose marker  
255 genotype data is in an  $n_i \times n_m$  matrix  $\mathbf{W}$  for  $n_m$  marker effects  $\mathbf{m}$ , and  $\mathbf{e}$  is an  $n_y \times 1$  vector  
256 of  $n_y$  residuals. In this study  $n_y$  was 3,420,  $n_b$  was 6,  $n_i$  was 3,070 and  $n_m$  was 10,500. We  
257 assumed that marker effects are *a priori* uncorrelated and normally distributed with zero

258 mean and variance component describing variation between marker effects  $\sigma_m^2$  (Eq. 3). We  
259 further assumed that residuals are uncorrelated and normally distributed with zero mean  
260 and residual variance  $\sigma_e^2$  (Eq. 4). We ignored that different yield trials had different amount  
261 or replication and therefore different error variance.

262 The model (Eq. 2-4) has location parameters (means)  $\mathbf{b}$  and  $\mathbf{m}$  and dispersion parame-  
263 ters (variances)  $\sigma_m^2$  and  $\sigma_e^2$ . We emphasise that  $\sigma_m^2$  is variance between marker effects and  
264 note that the commonly used approximation for “genomic variance”  $\sigma_m^2 2 \sum_{m=1}^{n_m} p_m(1 - p_m)$   
265 (VanRaden, 2008; Hayes *et al.*, 2009) is scaled variance between marker effects and not  
266 genetic variance (Gianola *et al.*, 2009; de los Campos *et al.*, 2015). The scaling factor  
267 is the sum of expected variances for marker genotypes assuming Hardy-Weinberg equilib-  
268 rium. Comparison of this approximation with (Eq. 1) shows that the approximation ignores  
269 linkage-disequilibrium and non-Hardy-Weinberg components of genetic variance as well as  
270 uses variance between marker effects instead of QTL effects. However, linkage-disequilibrium  
271 affects estimate of variance between marker effects. At any rate, this “misspecified” estimate  
272 of genetic variance is not useful for temporal or genomic analyses. We view variance be-  
273 tween marker effects simply as a statistical/model parameter that facilitates model fitting  
274 to observed data. We describe the model fitting and estimation of variances in the next  
275 sub-section.

## 276 **2.4 Statistical and computational approaches**

277 We used the empirical and full Bayesian approach to fit the model (Eq. 2-4) with marker  
278 genotypes or their leading principal components. To fit the model (Eq. 2-4) we note that this  
279 is the ridge regression applied to marker genotype data (Whittaker *et al.*, 2000; Meuwissen  
280 *et al.*, 2001; de los Campos *et al.*, 2013). Given the variances  $\sigma_m^2$  and  $\sigma_e^2$  we can estimate

281 fixed effects  $\mathbf{b}$  and marker effects  $\mathbf{m}$  by solving the mixed model equations:

$$\begin{bmatrix} \mathbf{X}^T \mathbf{X} & \mathbf{X}^T \mathbf{Z} \mathbf{W} \\ \mathbf{W}^T \mathbf{Z}^T \mathbf{X} & \mathbf{Z}^T \mathbf{W}^T \mathbf{W} \mathbf{Z} + \mathbf{I} \sigma_e^2 \sigma_m^{-2} \end{bmatrix} \begin{bmatrix} \hat{\mathbf{b}} \\ \hat{\mathbf{m}} \end{bmatrix} = \begin{bmatrix} \mathbf{X}^T \mathbf{y} \\ \mathbf{Z}^T \mathbf{W}^T \mathbf{y} \end{bmatrix}. \quad (5)$$

282 Specifically, the solution of (Eq. 5) is the conditional expectation  $(\hat{\mathbf{b}}, \hat{\mathbf{m}}) = E(\mathbf{b}, \mathbf{m} | \mathbf{y}, \sigma_m^2, \sigma_e^2)$ .

283 With these estimates we can obtain estimates of genetic values as  $\hat{\mathbf{a}} = \mathbf{W} \hat{\mathbf{m}}$ . These estimates  
284 have some error and ignoring it in the framework will underestimate genetic variance. To  
285 see this, imagine we have very little phenotypic information such that marker estimates will  
286 effectively follow the prior (Eq. 3). In that case, marker estimates will effectively all equal  
287 zero and any variance calculation will return zero. As shown by Sorensen *et al.* (2001) and  
288 Lehermeier *et al.* (2017) we can account for this uncertainty by estimating genetic variances  
289 from posterior samples of genetic values or marker effects. For the model (Eq. 2-4, 5) we  
290 can obtain posterior samples from the multivariate normal distribution:

$$N(E(\mathbf{b}, \mathbf{m} | \mathbf{y}, \sigma_m^2, \sigma_e^2), \text{Var}(\mathbf{b}, \mathbf{m} | \mathbf{y}, \sigma_m^2, \sigma_e^2)), \quad (6)$$

291 where conditional variance  $\text{Var}(\mathbf{b}, \mathbf{m} | \mathbf{y}, \sigma_m^2, \sigma_e^2)$  can be obtained by solving the left-hand-side  
292 of the system of equations (Eq. 5) (Sorensen and Gianola, 2007).

293 Once we obtained samples of marker effects from (Eq. 6) we have treated marker geno-  
294 types and marker effects respectively as QTL genotypes and QTL effects and analysed tem-  
295 poral and genomic trends in genetic variance as described above. Specifically, for each  
296 sample of marker effects we have estimated genetic values and their variance for each group  
297 of individuals in the breeding programme (parents, F<sub>1</sub> progeny, headrows, ...) across years  
298 for the temporal analysis and further partitioned across genome for the genomic analysis.  
299 This procedure gave us posterior distribution for all these variances. In results we compare  
300 how these posterior distributions match the true variances from simulation. In addition, we

301 also calculated the continuous ranked probability score (CRPS) to compare whole posterior  
302 distributions to true values to assess both accuracy and precision and with this quantify ac-  
303 counting for the uncertainty of estimation. For an intuitive description of CRPS see Selle  
304 *et al.* (2019).

305 When variances are unknown, we can use the empirical Bayesian approach (Efron,  
306 1996; Sorensen and Gianola, 2007) and estimate most likely variances given the data and  
307 use them to calculate conditional expectation and variance as well as draw samples from  
308 (Eq. 6). Alternatively, we can use the full Bayesian approach by specifying prior dis-  
309 tribution for all model parameters and obtain posterior distribution  $p(\mathbf{b}, \mathbf{m}, \sigma_m^2, \sigma_e^2 | \mathbf{y}) \propto$   
310  $p(\mathbf{y} | \mathbf{b}, \mathbf{m}, \sigma_e^2) p(\mathbf{b} | \sigma_b^2) p(\mathbf{m} | \sigma_m^2) p(\sigma_b^2) p(\sigma_m^2) p(\sigma_e^2)$  (Sorensen and Gianola, 2007).

311 We fitted the model (Eq. 2-4) both with the full and the empirical Bayesian approach.  
312 We first used MCMC for a full Bayesian approach and used one chain with 100,000 samples,  
313 10,000 burn-in and saved every 100th sample to obtain 900 samples of all model parameters.  
314 For the empirical Bayesian approach, we also obtained 900 samples, but used posterior mean  
315 for the marker effect and residual variances estimated from the full Bayesian approach when  
316 sampling from (Eq. 6).

317 Since genomic analyses can be time-consuming we have also analysed use of approxima-  
318 tion for marker genotypes with their leading principal components. We changed the model  
319 (Eq. 2-4) into:

$$\mathbf{y} = \mathbf{X}\mathbf{b} + \mathbf{Z}\mathbf{T}\mathbf{s} + \mathbf{e}, \quad (7)$$

$$\mathbf{s} \sim N(\mathbf{0}, \mathbf{I}\sigma_s^2), \quad (8)$$

$$\mathbf{e} \sim N(\mathbf{0}, \mathbf{I}\sigma_e^2), \quad (9)$$

320 where  $\mathbf{T}$  is an  $n_i \times n_p$  score matrix obtained from a truncated singular value decomposition of



321 genotypes with the  $n_p$  leading principal components such that  $\mathbf{T}_{(n_i \times n_p)} = \mathbf{U}_{(n_i \times n_p)} \mathbf{S}_{(n_p \times n_p)} =$   
322  $\mathbf{U}_{(n_i \times n_p)} \mathbf{S}_{(n_p \times n_p)} \mathbf{V}_{(n_m \times n_p)}^T \mathbf{V}_{(n_m \times n_p)} = \mathbf{W}_{(n_i \times n_m)} \mathbf{V}_{(n_m \times n_p)}$ ,  $\mathbf{s}$  is an  $n_p \times 1$  vector of  $n_p$  princi-  
323 pal component effects and  $\sigma_s^2$  is variance between principal component effects (Hastie and  
324 Tibshirani, 2004; Tusell *et al.*, 2013; Ødegård *et al.*, 2018). This model is structurally the  
325 same as the model (Eq. 2-4) and we fitted it in the same way. We approximated marker  
326 effect samples by  $\mathbf{m}^i = \mathbf{V} \mathbf{s}^i$ , where  $\mathbf{s}^i$  is the  $i$ -th sample of principal component effects. Once  
327 we approximated marker effect samples we used the same approach as described above. We  
328 investigated different number of principal components (10, 50, 100, 500, 1000, 2000, and  
329 3420). In our simulation these numbers of principal components respectively explained 14%,  
330 38%, 52%, 84%, 94%, 99%, and 100% of marker genotype variation.

## 331 2.5 Software implementation

332 We have simulated the wheat breeding programme with the AlphaSimR R package ([https://cran.r-](https://cran.r-project.org/web/packages/AlphaSimR/index.html)  
333 [project.org/web/packages/AlphaSimR/index.html](https://cran.r-project.org/web/packages/AlphaSimR/index.html)) (Gaynor *et al.*, 2020). We have fitted the  
334 model with the AlphaBayes software (<https://www.alphagenes.roslin.ed.ac.uk/alphabayes>)  
335 (Gorjanc and Hickey, 2019). We used R (R Core Team, 2019) for post-processing the Al-  
336 phaBayes marker effect samples and further analyses. We used the scoringRules R package  
337 to calculate the continuous ranked probability score (CRPS) (Jordan *et al.*, 2019).

## 338 3 Results

339 Overall the results show that estimates from the data following the framework were in  
340 concordance with the true values for temporal and genomic analysis. We separate the result  
341 section into three areas to facilitate presentation: (1) temporal analysis, (2) genomic analysis,  
342 and (3) computational analysis.

### 3.1 Temporal analysis

The genetic and genic variance changed through the breeding cycle. We show this in figure 3 with the true and estimated genetic and genic variances for different stages of one breeding cycle. As expected, genetic variation in  $F_1$  progeny across multiple crosses was lower than in the parents as this variance indicates variance in parent averages between crosses. When we generated doubled haploids for these full-sib families (HDRW stage), genetic variation was regenerated to the level in parents due to recombination and complete inbreeding. Genetic variation gradually reduced through the breeding cycle due to the selection from headrows to elite yield trial. This change was particularly evident for genetic variance, but less for genic variance. Also, genetic variance was consistently smaller than genic variance. The estimates of genetic and genic variance matched the true values well across all breeding stages. There was a larger uncertainty in the estimate of genetic variance in elite yield trial than in other stages.

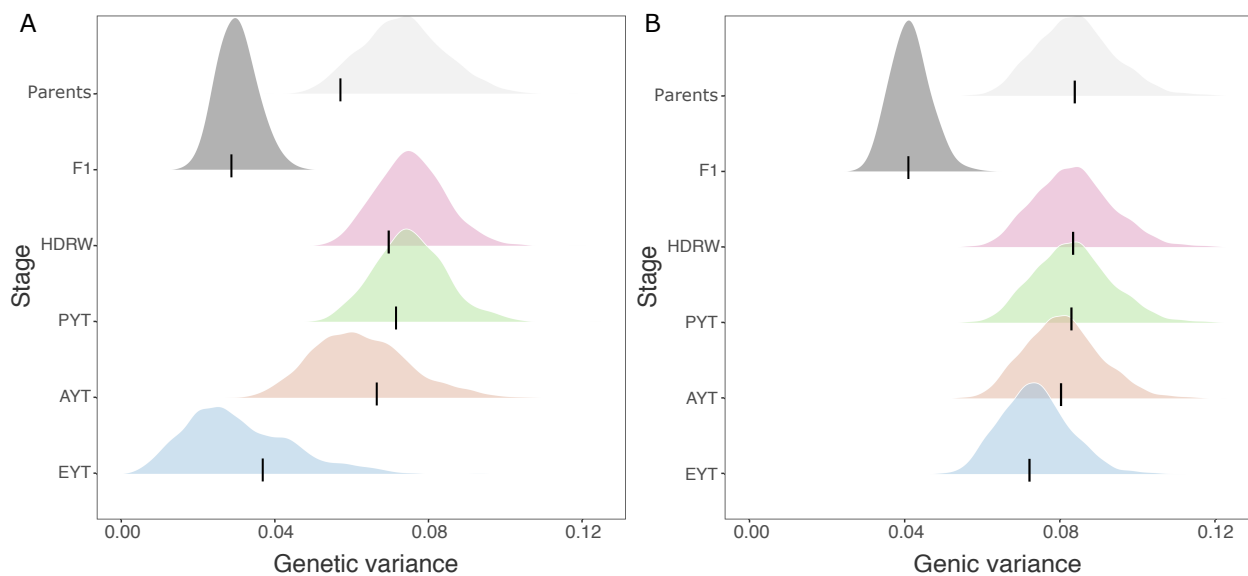

Figure 3: Genetic (A) and genic (B) variance estimated with the full Bayesian approach for parents in year 16,  $F_1$  progeny (F1) in year 17, headrows (HDRW) in year 18, preliminary yield trial (PYT) in year 19, advanced yield trial (AYT) in year 20, and elite yield trial (EYT) in year 21; black lines denote the true values and densities depict posterior distributions

356 Genetic variation decreased over years and genetic variance was consistently smaller as  
357 well as more variable than genic variance across years. We show this in figure 4 with the true  
358 and estimated temporal trends of genetic and genic variances for different breeding stages.  
359 Variances between the breeding stages differed as mentioned before, but in this figure we  
360 also see a consistent decrease over the years. This decrease was variable for genetic variance,  
361 but not for genic variance. This variability increased from early to late breeding stages as  
362 there was less and less individuals in a stage. The estimates of genetic and genic variance  
363 matched the true values very well across all breeding stages and years.

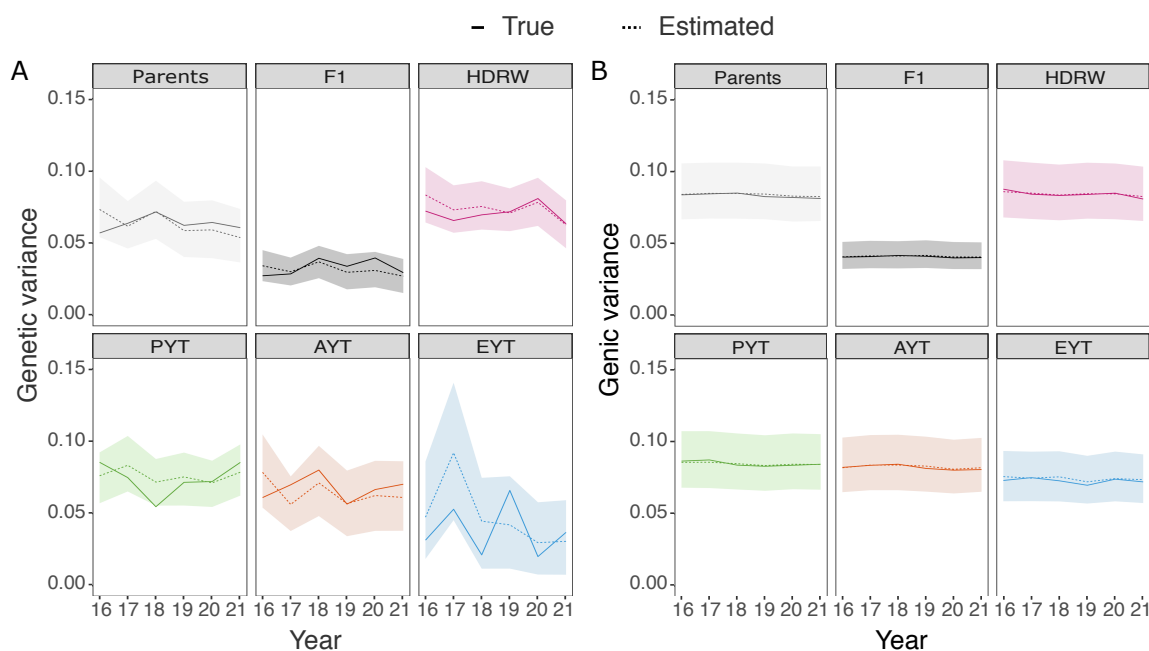

Figure 4: Temporal trends in genetic (A) and genic (B) variance estimated with the full Bayesian approach for parents,  $F_1$  progeny (F1), headrows (HDRW), preliminary yield trial (PYT), advanced yield trial (AYT), and elite yield trial (EYT); solid lines denote the true value, dashed lines denote posterior means and polygons depict 95% posterior quantiles

### 364 3.2 Genomic analysis

365 Genomic analysis enabled accurate partitioning of whole-genome genetic variance into whole-  
366 genome genic variance and whole-genome linkage-disequilibrium covariances. We show this

367 in figure 5 with true and estimated variances and covariances for headrows and elite yield  
368 trial from one breeding cycle. The figure shows previously described differences in genetic  
369 and genic variances as well as a substantial change in the between-chromosome linkage-  
370 disequilibrium covariance, which was the main driver of change in genetic variance between  
371 headrows and the elite yield trial. Specifically, genetic variance decreased from 0.0754 in  
372 headrows in year 18 to 0.0307 in the elite yield trial in year 21, with a change of 0.0447  
373 (59% reduction). This overall change was due to 0.01 change in genic variance (22% of  
374 the initial genetic variance), 0.0036 change in within-chromosome linkage-disequilibrium co-  
375 variance (8% of the initial genetic variance) and 0.0311 change in between-chromosome  
376 linkage-disequilibrium covariance (70% of the initial genetic variance). We again note that  
377 the estimates matched the true values well.

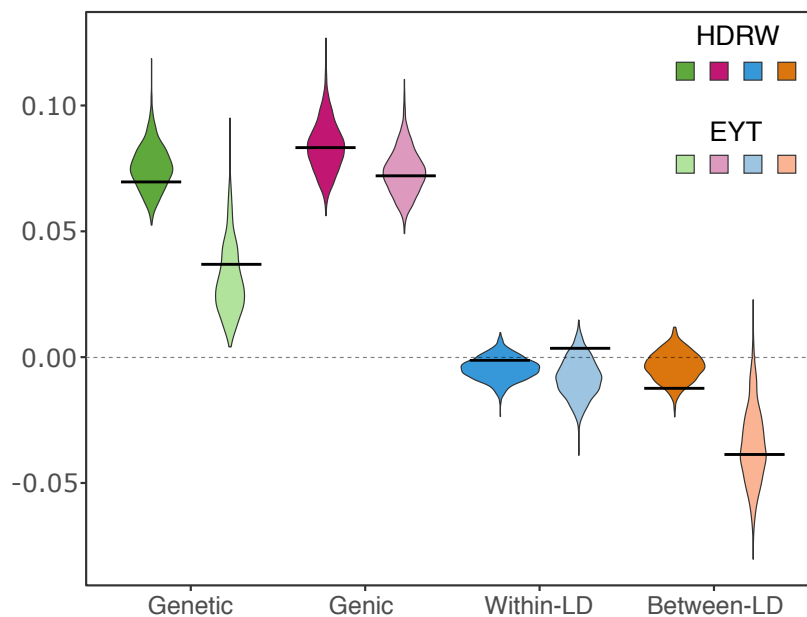

Figure 5: Whole-genome genetic and genic variances, and within- and between-chromosome linkage disequilibrium (LD) covariances with the full Bayesian approach for headrows (HDRW, year 18) and elite yield trial (EYT, year 21); genetic variance is the sum of genic variance, within- and between-chromosome LD (see Fig. 2); black lines denote true values and violins depict posterior distributions

378 Genomic analysis enabled also accurate partitioning of whole-genome genetic variance

379 for specific chromosomes. We show this in the supplementary material with a series of tables  
380 (S1-S4) and one figure (S1). The tables show genetic variance and its components (genic  
381 variance, within-chromosome linkage-disequilibrium covariance and between-chromosome  
382 linkage-disequilibrium covariance) by 21 chromosomes as well as how these values add up  
383 to the whole-genome variance. We show this partitioning for QTL genotypes (Table S1),  
384 marker genotypes (Table S2), true genetic values (Table S3), and estimated genetic values  
385 (Table S4). The figure S1 compares the true and estimated genetic values directly. The  
386 aim of this supplementary material is to demonstrate how we estimate variation in true ge-  
387 netic values, which is driven by unknown QTL and unknown QTL effects, by using marker  
388 genotypes and estimated marker effects. We make five observations. First, the analysis  
389 of QTL genotypes showed that whole-genome and chromosome genetic variance in unse-  
390 lected headrows is largely driven by genic variance, but there are some chromosomes with  
391 a substantial within-chromosome or between-chromosome linkage-disequilibrium covariance.  
392 Second, the magnitude of linkage-disequilibrium covariances increased in the elite yield trial,  
393 which reduced the whole-genome genetic variance. However, between-chromosome linkage-  
394 disequilibrium was larger than within-chromosome linkage-disequilibrium. Third, the anal-  
395 ysis of marker genotypes followed the same trends, but the values were sustainability larger  
396 due to larger number of markers than QTL. Fourth, the analysis of true genetic values re-  
397 sulted in much smaller values for variances than the analysis of QTL genotypes because  
398 most QTL have small effects, but the relative magnitude of variation and its partitioning  
399 was similar. Fifth, the analysis of estimated genetic values followed closely the analysis of  
400 true genetic values - most deviations were observed for the elite yield trial, but all posterior  
401 distributions encompassed the true value. This analysis pertains to one single dataset to  
402 show that estimates are reasonable for a specific dataset.

### 403 3.3 Computational analysis

404 Full and empirical Bayesian approaches had similar posterior mean estimates of variances,  
405 but empirical Bayesian approach had smaller posterior standard deviation. We show this in  
406 figure 6 with a comparison of posterior means and posterior standard deviations for genetic  
407 and genic variance between the two approaches. The posterior means matched well for  
408 both types of variances. The posterior standard deviation was smaller with the empirical  
409 Bayesian approach, in particular for the genic variance. Comparison with the true values  
410 however showed good concordance with the empirical Bayesian posterior means (Fig. S2  
411 and S3).

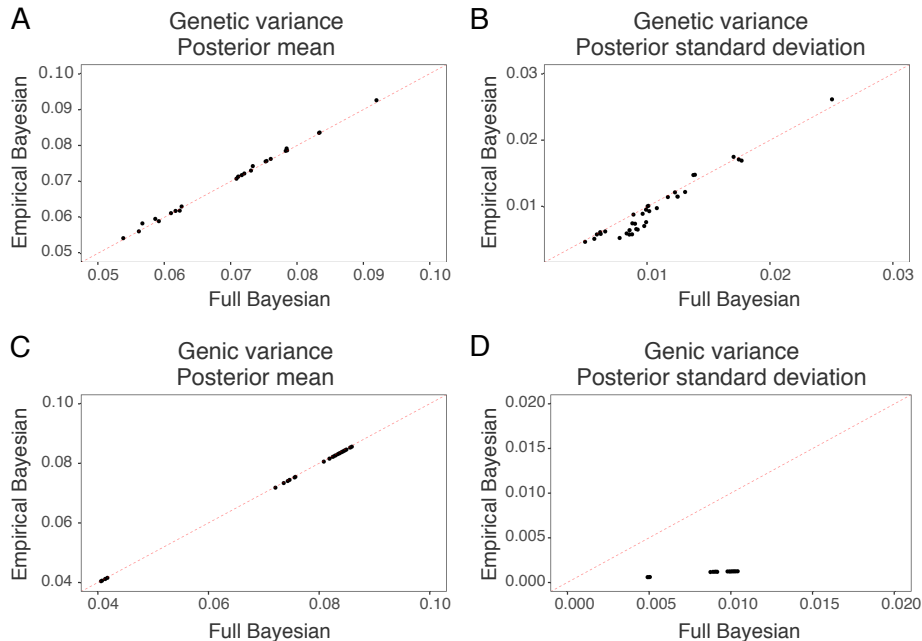

Figure 6: The empirical Bayesian approach versus the full Bayesian approach for posterior mean of genetic variance (A), posterior mean of genic variance (B), posterior standard deviation of genetic variance (C), and posterior standard deviation of genic variance (D); equal value is represented by the dashed red line

412 Additional evaluation with multiple replicates showed that the full and empirical Bayesian  
413 results were consistently estimated for genetic and genic variance estimates. We show this  
414 in table 1 with continuous ranked probability score (CRPS) of genetic and genic variances

415 for full and empirical Bayesian approaches by breeding stage. Note that CRPS is negatively  
 416 oriented - lower values indicate better estimate compared to the true value in terms of  
 417 accuracy and precision. CRPS for genetic variance matched closely between the full and  
 418 empirical Bayesian approaches. On the other hand, they differ more for genic variance, with  
 419 better (lower) values for the full Bayesian approach, albeit there was large variability across  
 420 years and replicates. CRPS was larger (worse) for genic variance than for genetic variance.

Table 1: Continuous ranked probability score (CRPS  $\times$  1000 - lower is better: mean  $\pm$  standard deviation over six years and ten replicates) for genetic and genic variance estimated by the full Bayesian and the empirical Bayesian for parents, F<sub>1</sub> progeny, headrows (HDRW), preliminary yield trial (PYT), advanced yield trial (AYT), and elite yield trial (EYT)

| Stage          | Genetic     |             | Genic        |              |
|----------------|-------------|-------------|--------------|--------------|
|                | Full        | Empirical   | Full         | Empirical    |
| Parents        | 59 $\pm$ 40 | 60 $\pm$ 41 | 300 $\pm$ 93 | 351 $\pm$ 97 |
| F <sub>1</sub> | 42 $\pm$ 39 | 42 $\pm$ 40 | 40 $\pm$ 44  | 48 $\pm$ 52  |
| HDRW           | 45 $\pm$ 32 | 46 $\pm$ 37 | 297 $\pm$ 94 | 348 $\pm$ 99 |
| PYT            | 63 $\pm$ 57 | 64 $\pm$ 64 | 296 $\pm$ 94 | 348 $\pm$ 98 |
| AYT            | 66 $\pm$ 63 | 66 $\pm$ 64 | 294 $\pm$ 92 | 344 $\pm$ 97 |
| EYT            | 79 $\pm$ 45 | 80 $\pm$ 46 | 70 $\pm$ 75  | 84 $\pm$ 90  |

421 Approximation with leading principal components accurately estimated genetic variance  
 422 when we used sufficient number of principal components, but this was never the case for  
 423 genic variance. We show this in figure 7 with estimation error, defined as the difference  
 424 between the true and estimated value, for genetic and genic variance as a function of the  
 425 number of leading principal components. The estimation error decreased as we increased  
 426 the number of leading principal components. It decreased quickly for the genetic variance  
 427 - there was no error once we captured about 80% of variation in marker genotypes. In our  
 428 simulated dataset we achieved this with 500 leading principal components. On the other  
 429 hand, the estimation error decreased slowly for the genic variance and we never recovered  
 430 the true estimate, even if we used all the principal components. The estimation error was  
 431 smallest in the F<sub>1</sub> progeny, followed by the elite yield trial, while the largest estimation error

432 were in headrows.

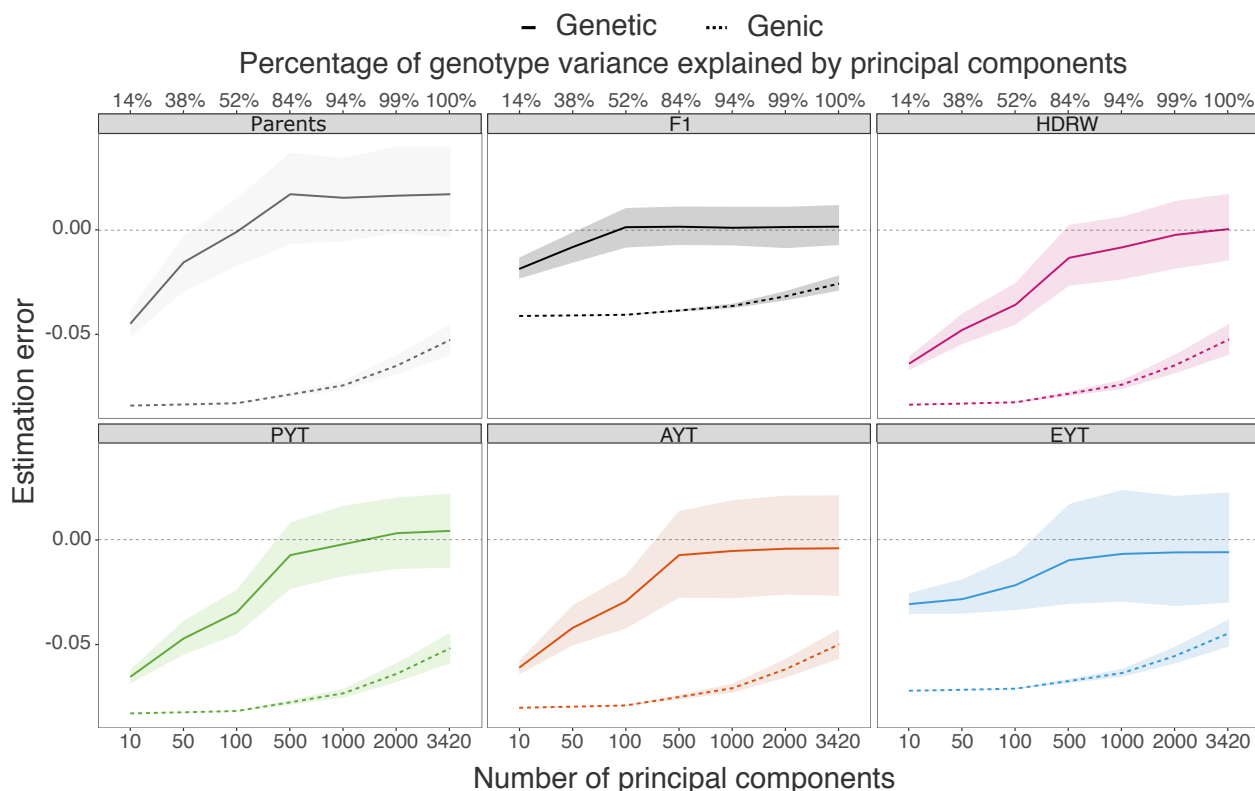

Figure 7: Estimation error in genetic and genic variances as a function of the number of principal components in parents in year 16,  $F_1$  progeny ( $F_1$ ) in year 17, headrows (HDRW) in year 18, preliminary yield trial (PYT) in year 19, advanced yield trial (AYT) in year 20, and elite yield trial (EYT) in year 21; horizontal dashed line represents no estimation error

## 433 4 Discussion

434 The results show that the framework for temporal and genomic analysis of genetic variation  
 435 is flexible, accurate and enables assessing the sustainability of a breeding programme as well  
 436 as processes that change genetic variance. These results highlights four topics for discussion  
 437 in line with the structure of results: (1) temporal analysis of genetic variance, (2) genomic  
 438 analysis of genetic variance, (3) computational aspects and (4) assumptions of this study.



## 439 4.1 Temporal analysis

440 This study will help breeders to assess the amount of genetic variance in their programmes  
441 and with this better management of its utilization for future genetic gains. Genetic vari-  
442 ance (specifically its square root) is key component of the breeders equation for predicting  
443 response to selection (Lush, 1937; Falconer and Mackay, 1996). While breeding programmes  
444 routinely estimate genetic variance for traits under selection, most estimates pertain to a  
445 group of individuals that is arguably not the most relevant for routine breeding (Piepho *et al.*,  
446 2008). Specifically, with the pedigree-based model the estimate of genetic variance pertains  
447 to pedigree founders, which can be several generations removed from currently interesting  
448 individuals. Further, pedigree founders often span multiple generations due to incomplete  
449 pedigrees and as such the corresponding estimate of genetic variance does not have a clearly  
450 defined time point. Estimates of genetic variance from genome-based models pertains to all  
451 genotyped individuals, which again does not have a clearly defined time point. In addition,  
452 the “genomic variance” is plagued with model “misspecification” (Gianola *et al.*, 2009; de los  
453 Campos *et al.*, 2015), see also Schreck *et al.* (2019).

454 The proposed framework that builds on the work of Sorensen *et al.* (2001), Lehermeier  
455 *et al.* (2017) and Allier *et al.* (2019) enables straightforward temporal analysis both in terms  
456 of years and stages of a breeding programme. The framework uses all the available data  
457 spanning multiple years (generations) to estimate model parameters, which are in turn used  
458 to infer genetic values and their variances. Such flexibility of using all data but producing  
459 estimates for any group of individuals is crucial to inform breeders how much genetic vari-  
460 ance they have at hand so that they can react accordingly. For example, temporal trends in  
461 genetic and genic variance enable straightforward trait specific estimation of effective popu-  
462 lation size (Gorjanc *et al.*, 2018). Using this approach in this study we estimated effective  
463 population size for the parents at 111. This estimate suggests that the simulated breed-  
464 ing programme is sustainable (Falconer and Mackay, 1996; Hill, 2016; Lynch and Walsh,

465 1998; Walsh and Lynch, 2018) as indicated by small changes in genetic variance between  
466 years. Possible reactions to a temporal analysis by a breeder could be keeping the current  
467 breeding programme as it is, implementing active management of genetic variance using  
468 techniques such as optimal contribution selection (e.g., Woolliams *et al.*, 2015; Akdemir and  
469 Sánchez, 2016; Gorjanc *et al.*, 2018; Akdemir *et al.*, 2019), germplasm exchange with other  
470 programmes or in the extreme introgressing landrace germplasm (e.g., Gorjanc *et al.*, 2016).

471 There are also other approaches to temporal analysis of genetic variance. Tsuruta *et al.*  
472 (2004) used the random regression model to model genetic values and their variance over  
473 years and Hidalgo *et al.* (2020) used sliding time intervals in the same fashion. Both methods  
474 have some drawbacks - random regression can be computationally expensive, while time  
475 intervals must be sufficiently large to obtain accurate estimates. These two approaches  
476 respectively enrich the model or slice the data to estimate genetic variances over time, while  
477 the proposed framework treats model variance parameters and genetic variances over time as  
478 two separate sets. We will address these differences at the end of discussion. Hidalgo *et al.*  
479 (2020) used sliding time intervals to investigate changes in genetic (co)variances for a breeding  
480 programme that recently implemented genomic selection. They observed rapid changes in  
481 genetic (co)variances with the implementation of genomic selection. Their results clearly  
482 highlight a need for breeder's reaction and further investigation. One such investigation  
483 should be on which components of genetic variance changed with the implementation of  
484 genomic selection.

## 485 **4.2 Genomic analysis**

486 The proposed framework can estimate size and trends for genomic components of genetic  
487 variance. We have followed a standard quantitative genetics decomposition of genetic vari-  
488 ance (Bulmer, 1971; Lynch and Walsh, 1998; Gianola *et al.*, 2009; Walsh and Lynch, 2018),  
489 which involves a component due to variance of genotypes and their allele substitution ef-

490 fects at every quantitative trait locus (genic variance) and a component due to covariance  
491 between genotypes and their allele substitution effects between loci on one chromosome  
492 (within-chromosome linkage-disequilibrium covariance) and between chromosomes (between-  
493 chromosome linkage-disequilibrium covariance). Our results show promising utility of the  
494 proposed framework. We showed this decomposition for quantitative trait locus genotypes,  
495 marker genotypes, true genetic values and estimated values, all at the whole-genome and  
496 chromosome level. These results confirmed the prediction of Bulmer (1971) that directional  
497 selection on total genetic values or their functions (phenotype) induces negative linkage-  
498 disequilibrium and that this component can cause rapid and major changes in genetic vari-  
499 ance (Lynch and Walsh, 1998; Walsh and Lynch, 2018). We note that this negative linkage-  
500 disequilibrium is a function of genotype combinations between loci as well as their allele  
501 substitution effects. Therefore, we have to distinguish between linkage-disequilibrium be-  
502 tween genotypes, which is trait agnostic, and linkage-disequilibrium between locus genetic  
503 values (see Tables S1-S4).

504 The importance of linkage-disequilibrium in estimating genetic variance with genomic  
505 data is growing (de los Campos *et al.*, 2015; Lehermeier *et al.*, 2017; Allier *et al.*, 2019).  
506 Our study added to this literature with a simulation study and demonstrating temporal  
507 changes in linkage-disequilibrium under selection both within one breeding cycle (headrows  
508 to elite yield trial) and between breeding cycles over years. We observed larger changes  
509 within breeding cycles than between, which can be explained by strong selection within cy-  
510 cles and recombinations among initial parent genomes between cycles. Interestingly, we ob-  
511 served large between-chromosome linkage-disequilibrium covariance in comparison to within-  
512 chromosome. This is at odds with physical linkage between loci within a chromosome and no  
513 such linkage between loci on separate chromosomes. Our explanation for this is that there is  
514 a larger number of combinations between loci on separate chromosomes than within chromo-  
515 somes. Further, limited recombination constrains selection to induce linkage-disequilibrium

516 within chromosomes compared to between chromosomes. To put this into perspective, in  
517 the analysed example we observed a 59% change in genetic variance within a breeding cycle  
518 (headrows to elite yield trial) of which 22% was due to the change in genic variance, 8%  
519 was due to the change in within-chromosome linkage-disequilibrium covariance and 70% was  
520 due to the change in between-chromosome linkage-disequilibrium covariance. These overall  
521 values varied considerably between chromosomes, where we emphasise that our simulation  
522 randomly placed loci and randomly allocated effects from one common distribution. These  
523 assumptions are likely too simple and indeed Allier *et al.* (2019) observed strong variation  
524 between chromosomes in maize. All in all, these results indicate that linkage-disequilibrium  
525 is an important component of the genetic variance in line with the theoretical work of Bulmer  
526 (1971) and Mather and Jinks (2013).

527 We expected that we will underestimate genic variance in this breeding study, but have  
528 not observed this. We have simulated breeding programme with directional selection, which  
529 induces negative linkage-disequilibrium (Bulmer, 1971) due to repulsion linkage (Mather  
530 and Jinks, 2013). We expected that repulsion linkage will “hide” variation in some genome  
531 regions due to a lack of variation in haplotypes and that we will therefore underestimate  
532 genic variance. This did not happen either because effective population was reasonably large  
533 (111), selection was not too strong or there were sufficient number of markers. However,  
534 across multiple replicates the continuous ranked probability score was worse for genic than  
535 genetic variance, which could indicate this systematic underestimation.

536 The presented framework for genomic analysis of genetic variance will pave the way for  
537 analysing processes that change the variance. While selection induces linkage-disequilibrium  
538 between loci it also changes allele frequencies (Bulmer, 1971; Lynch and Walsh, 1998; Gorjanc  
539 *et al.*, 2015; Walsh and Lynch, 2018). Another important process is drift, which is always  
540 present in breeding programmes due to small effective population sizes. Distinguishing be-  
541 tween selection and drift in such populations is difficult (Lynch and Walsh, 1998; Gorjanc

542 *et al.*, 2015; Walsh and Lynch, 2018) and further work is required. Similarly, population  
543 structure and admixture between populations can influence genetic variance and should be  
544 addressed in the future. One way to treat population structure would be to partition in-  
545 dividuals by sub-population and calculate separate genetic variances as well as covariances  
546 between sub-populations. This approach breaks down with admixture. Admixture could  
547 be approached by using whole population genome trees with recombination (Kelleher *et al.*,  
548 2019) and label individuals and genome segments with originating sub-populations and ex-  
549 pand the framework into population analysis of genetic variance.

550 A final note on genomic analysis is that the proposed framework does not depend on the  
551 assumption of Hardy-Weinberg and linkage equilibrium. It is common to see expressions for  
552 genetic variance at a locus of the form  $2p(1-p)\alpha^2$ , which assumes independent binomial  
553 sampling of alleles with probability  $p$  (Hardy-Weinberg equilibrium). In some breeding  
554 programmes there is an excess of homozygotes over heterozygotes, particularly in plant  
555 breeding programmes that use selfing. In this case we have a clear deviation from the Hardy-  
556 Weinberg equilibrium and the expression  $2p(1-p)\alpha^2$  will underestimate genetic variance.  
557 To see this consider  $p = 0.5$  and  $\alpha = 1$ , which gives  $2p(1-p)\alpha^2 = 0.5$ , but if we only  
558 have reference and alternative homozygotes (50% each) the actual variance is doubled due  
559 to complete inbreeding (Wright, 1931). While there are expressions that involve inbreeding  
560  $2p(1-p)(1+F)\alpha^2$ , where  $2p(1-p)(1+F)$  is variance of genotypes under non-random  
561 mating, we suggest a simpler straightforward calculation of sample variance of genotypes at  
562 a locus and multiplying that variance with  $\alpha^2$ . Bulmer (1976) was aware of these differences  
563 and partitioned genic variance into the value expected under Hardy-Weinberg equilibrium  
564 (binomial sampling of alleles)  $2p(1-p)\alpha^2$  and deviation due to non-random mating  $F\alpha^2$ .

### 565 4.3 Computational aspects

566 The proposed framework is based on Sorensen *et al.* (2001), Lehermeier *et al.* (2017), and  
567 Allier *et al.* (2019) that used the full Bayesian approach and MCMC sampling. We performed  
568 our analyses with the full and empirical Bayesian approach and found a good concordance  
569 between the two approaches and true values. However, there was tendency of the empirical  
570 Bayesian approach to underestimate uncertainty of inferred genetic variances, due to ignoring  
571 uncertainty in estimating model variance parameters. This is expected, but it seems that  
572 the difference is not large, though this will vary between datasets. The full Bayesian analysis  
573 with marker-based models is not too computationally demanding if the number of markers  
574 is not too large (10-50K markers can be handled with ease). The full Bayesian analysis can  
575 be quite demanding with genome-based model on individuals if the number of individuals is  
576 large, but equivalence with the marker-based model means we can fit one or another model  
577 and back-solve desired effects (Strandén and Garrick, 2009). There are also frequentist  
578 approaches that account for uncertainty of estimating variance components (e.g. Kenward  
579 and Roger, 1997). For the genomic analysis there is an advantage (in terms of flexibility) in  
580 working with marker effects and marker genotypes.

581 The observation that leading principal components underestimate genic variance require  
582 further studies. We expected that increasing the number of leading principal components  
583 will reduce the estimation error, which we observed for genetic variance, while we observed  
584 consistent underestimation for genic variance - even with all principal components. Since we  
585 had more markers than individuals this is likely due to the fact that “null” components would  
586 still have some uncertainty in estimation, which we ignored and therefore underestimated  
587 genic variance. Methods presented in the supplementary of Listgarten *et al.* (2012) could be  
588 used to correct for this.

## 589 4.4 Assumptions

590 In this study we made two related assumptions and one unrelated assumption. First, we  
591 assumed that allele effects are constant over time and across groups of individuals. This is a  
592 reasonable assumption in a sense that we used all the available data to accurately estimate  
593 marker effects. Time- or background-specific estimation could better reflect reality, because  
594 linkage-disequilibrium is changing over time, but getting accurate estimates from less data is  
595 challenging and so is defining time intervals or backgrounds. The random regression and time  
596 interval approaches (Tsuruta *et al.*, 2004; Hidalgo *et al.*, 2020) have an advantage with this  
597 aspect, but a limitation in terms of flexibility for the genomic analysis of genetic variance.  
598 This aspect of variable effects will likely be more important with breeding programmes that  
599 introgress germplasm from other populations, but there will also likely be too little data  
600 to estimate separate effects. Estimation of background-specific effects is an active research  
601 area in genetics with growing datasets across various populations (e.g., Peterson *et al.*, 2019;  
602 van den Berg *et al.*, 2020). Second, we assumed fully additive genetic architecture under  
603 which allele effects are constant across time and groups of individuals. While both theory  
604 and data indicate that average effect of an allele substitution capture majority of genetic  
605 variance (Hill *et al.*, 2008), recognition of dominance and epistasis is growing (e.g., Varona  
606 *et al.*, 2018). Recognition of genotype interactions with environment is also growing (e.g.,  
607 Tolhurst *et al.*, 2019). The proposed framework can be expanded to these settings, but  
608 the success of inferring various variances, potentially in different environments, will critically  
609 depend on volume of data to estimate much larger number of parameters. Third, we assumed  
610 a sufficiently dense panel of markers that collectively closely track quantitative trait loci.  
611 Insufficient number of markers will deteriorate the ability of the proposed framework to  
612 capture genetic variance at and between quantitative trait loci.

## 613 Acknowledgments

614 The authors acknowledge the financial support from the BBSRC ISP to The Roslin In-  
615 stitute BBS/E/D/30002275, the grant BBSRC IIA PIII-036 and the University of Edin-  
616 burghs Data-Driven Innovation Chancellors fellowship. This work has made use of the  
617 resources provided by the University of Edinburgh Compute and Data Facility (ECDF)  
618 (<http://www.ecdf.ed.ac.uk>).

## 619 Conflict of Interest

620 The authors declare that they have no conflict of interest.

## 621 Data Availability

622 We provide all analysis scripts at:  
623 [https://git.ecdf.ed.ac.uk/HighlanderLab\\_public/llara\\_gen\\_var\\_plants](https://git.ecdf.ed.ac.uk/HighlanderLab_public/llara_gen_var_plants).

## 624 References

- 625 Akdemir, D., W. Beavis, R. Fritsche-Neto, A. K. Singh, and J. Isidro-Sánchez, 2019 Multi-  
626 objective optimized genomic breeding strategies for sustainable food improvement. *Hered-*  
627 *ity* **122**: 672.
- 628 Akdemir, D. and J. I. Sánchez, 2016 Efficient breeding by genomic mating. *Frontiers in*  
629 *genetics* **7**: 210.
- 630 Allier, A., S. Teyssède, C. Lehermeier, B. Claustres, S. Maltese, *et al.*, 2019 Assessment of  
631 breeding programs sustainability: application of phenotypic and genomic indicators to a  
632 north european grain maize program. *Theoretical and Applied Genetics* **132**: 1321–1334.



- 633 Awata, L. A., P. Tongoona, E. Danquah, B. E. Efe, and P. W. Marchelo-Dragga, 2018  
634 Common mating designs in agricultural research and their reliability in estimation of  
635 genetic parameters. *IOSR J. Agric. Vet. Sci* **11**: 16–36.
- 636 Bernardo, R., 1994 Prediction of maize single-cross performance using RFLPs and informa-  
637 tion from related hybrids. *Crop Science* **34**: 20–25.
- 638 Bernardo, R., 1996 Best linear unbiased prediction of maize single-cross performance. *Crop*  
639 *Science* **36**: 50–56.
- 640 Bernardo, R., 2002 *Breeding for quantitative traits in plants*, volume 1. Stemma press Wood-  
641 bury.
- 642 Brooks, S., A. Gelman, G. Jones, and X.-L. Meng, 2011 *Handbook of Markov Chain Monte*  
643 *Carlo*. CRC press.
- 644 Bulmer, M., 1971 The stability of equilibria under selection. *Heredity* **27**: 157–162.
- 645 Bulmer, M., 1976 The effect of selection on genetic variability: a simulation study. *Genetics*  
646 *Research* **28**: 101–117.
- 647 de los Campos, G., J. M. Hickey, R. Pong-Wong, H. D. Daetwyler, and M. P. L. Calus, 2013  
648 Whole-genome regression and prediction methods applied to plant and animal breeding.  
649 *Genetics* **193**: 327–345.
- 650 de los Campos, G., D. Sorensen, and D. Gianola, 2015 Genomic heritability: what is it?  
651 *PLoS Genetics* **11**: e1005048.
- 652 Efron, B., 1996 Empirical Bayes methods for combining likelihoods. *Journal of the American*  
653 *Statistical Association* **91**: 538–550.
- 654 Falconer, D. S. and T. F. Mackay, 1996 *Introduction to quantitative genetics*. Longman.

- 655 Gaynor, R. C., G. Gorjanc, A. R. Bentley, E. S. Ober, P. Howell, *et al.*, 2017 A two-part  
656 strategy for using genomic selection to develop inbred lines. *Crop Science* **57**: 2372–2386.
- 657 Gaynor, R. C., G. Gorjanc, and J. M. Hickey, 2020 AlphaSimR: An R-package for breeding  
658 program simulations. bioRxiv p. 2020.08.10.245167.
- 659 Gianola, D., G. de los Campos, W. G. Hill, E. Manfredi, and R. Fernando, 2009 Additive  
660 genetic variability and the Bayesian alphabet. *Genetics* **183**: 347–363.
- 661 Gilks, W. R., S. Richardson, and D. Spiegelhalter, 1995 *Markov chain Monte Carlo in*  
662 *practice*. Chapman and Hall/CRC.
- 663 Gorjanc, G., P. Bijma, and J. M. Hickey, 2015 Reliability of pedigree-based and genomic  
664 evaluations in selected populations. *Genetics Selection Evolution* **47**: 1–14.
- 665 Gorjanc, G., R. C. Gaynor, and J. M. Hickey, 2018 Optimal cross selection for long-term  
666 genetic gain in two-part programs with rapid recurrent genomic selection. *Theoretical and*  
667 *applied genetics* **131**: 1953–1966.
- 668 Gorjanc, G. and J. M. Hickey, 2019 AlphaBayes: Software for genome-wide marker regression  
669 along with fixed and random effects. User Manual. University of Edinburgh, UK .
- 670 Gorjanc, G., J. Jenko, S. J. Hearne, and J. M. Hickey, 2016 Initiating maize pre-breeding pro-  
671 grams using genomic selection to harness polygenic variation from landrace populations.  
672 *BMC Genomics* **17**: 1–15.
- 673 Hastie, T. and R. Tibshirani, 2004 Efficient quadratic regularization for expression arrays.  
674 *Biostatistics* **5**: 329–340.
- 675 Hayes, B. J., P. M. Visscher, and M. E. Goddard, 2009 Increased accuracy of artificial  
676 selection by using the realized relationship matrix. *Genetics research* **91**: 47–60.

- 677 Hem, I. G., M. L. Selle, G. Gorjanc, G.-A. Fuglstad, and A. Riebler, 2020 Robust ge-  
678 nomic modelling using expert knowledge about additive, dominance and epistasis varia-  
679 tion. bioRxiv .
- 680 Henderson, C. R., 1976 A simple method for computing the inverse of a numerator relation-  
681 ship matrix used in prediction of breeding values. *Biometrics* pp. 69–83.
- 682 Hidalgo, J., S. Tsuruta, D. Lourenco, Y. Masuda, Y. Huang, *et al.*, 2020 Changes in genetic  
683 parameters for fitness and growth traits in pigs under genomic selection. *Journal of Animal*  
684 *Science* **98**: skaa032.
- 685 Hill, W. G., 2016 Is continued genetic improvement of livestock sustainable? *Genetics* **202**:  
686 877–881.
- 687 Hill, W. G., M. E. Goddard, and P. M. Visscher, 2008 Data and theory point to mainly  
688 additive genetic variance for complex traits. *PLoS Genet* **4**: e1000008.
- 689 Jordan, A., F. Krüger, and S. Lerch, 2019 Evaluating probabilistic forecasts with scor-  
690 ingRules. *Journal of Statistical Software* **90**: 1–37.
- 691 Kelleher, J., Y. Wong, A. W. Wohns, C. Fadil, P. K. Albers, *et al.*, 2019 Inferring whole-  
692 genome histories in large population datasets. *Nature genetics* **51**: 1330–1338.
- 693 Kennedy, B., L. Schaeffer, and D. Sorensen, 1988 Genetic properties of animal models.  
694 *Journal of Dairy Science* **71**: 17–26.
- 695 Kenward, M. G. and J. H. Roger, 1997 Small sample inference for fixed effects from restricted  
696 maximum likelihood. *Biometrics* **53**: 983–997.
- 697 Lehermeier, C., G. de Los Campos, V. Wimmer, and C.-C. Schön, 2017 Genomic variance  
698 estimates: With or without disequilibrium covariances? *Journal of Animal Breeding and*  
699 *Genetics* **134**: 232–241.

- 700 Listgarten, J., C. Lippert, C. M. Kadie, R. I. Davidson, E. Eskin, *et al.*, 2012 Improved  
701 linear mixed models for genome-wide association studies. *Nature Methods* **9**: 525–526.
- 702 Lush, J., 1937 *Animal breeding plans*. Iowa State College Press.
- 703 Lynch, M. and B. Walsh, 1998 *Genetics and analysis of quantitative traits*, volume 1. Sinauer  
704 Sunderland, MA.
- 705 Mather, K. and J. L. Jinks, 2013 *Biometrical genetics: The study of continuous variation*.  
706 Springer.
- 707 Meuwissen, T., B. Hayes, and M. Goddard, 2001 Prediction of total genetic value using  
708 genome-wide dense marker maps. *Genetics* **157**: 1819–1829.
- 709 Meyer, K., 1985 Maximum likelihood estimation of variance components for a multivariate  
710 mixed model with equal design matrices. *Biometrics* pp. 153–165.
- 711 Meyer, K. and W. G. Hill, 1997 Estimation of genetic and phenotypic covariance functions for  
712 longitudinal or repeated records by restricted maximum likelihood. *Livestock Production  
713 Science* **47**: 185–200.
- 714 Oakey, H., A. Verbyla, W. Pitchford, B. Cullis, and H. Kuchel, 2006 Joint modeling of  
715 additive and non-additive genetic line effects in single field trials. *Theoretical and Applied  
716 Genetics* **113**: 809–819.
- 717 Oakey, H., A. P. Verbyla, B. R. Cullis, X. Wei, and W. S. Pitchford, 2007 Joint modeling  
718 of additive and non-additive (genetic line) effects in multi-environment trials. *Theoretical  
719 and Applied Genetics* **114**: 1319–1332.
- 720 Ødegård, J., U. Indahl, I. Strandén, and T. H. Meuwissen, 2018 Large-scale genomic pre-  
721 diction using singular value decomposition of the genotype matrix. *Genetics Selection  
722 Evolution* **50**: 6.

- 723 Peterson, R. E., K. Kuchenbaecker, R. K. Walters, C.-Y. Chen, A. B. Popejoy, *et al.*, 2019  
724 Genome-wide association studies in ancestrally diverse populations: opportunities, meth-  
725 ods, pitfalls, and recommendations. *Cell* **179**: 589–603.
- 726 Piepho, H. P., J. Möhring, A. E. Melchinger, and A. Büchse, 2008 BLUP for phenotypic  
727 selection in plant breeding and variety testing. *Euphytica* **161**: 209–228.
- 728 R Core Team, 2019 *R: A Language and Environment for Statistical Computing*. R Foundation  
729 for Statistical Computing, Vienna, Austria.
- 730 Schreck, N., H.-P. Piepho, and M. Schlather, 2019 Best prediction of the additive genomic  
731 variance in random-effects models. *Genetics* **213**: 379–394.
- 732 Selle, M. L., I. Steinsland, J. M. Hickey, and G. G., 2019 Flexible modelling of spatial  
733 variation in agricultural field trials with the R package INLA. *Theoretical and Applied*  
734 *Genetics* **132**: 3277–3293.
- 735 Smith, A. B., B. R. Cullis, and R. Thompson, 2005 The analysis of crop cultivar breeding  
736 and evaluation trials: an overview of current mixed model approaches. *The Journal of*  
737 *Agricultural Science* **143**: 449–462.
- 738 Sorensen, D., R. Fernando, and D. Gianola, 2001 Inferring the trajectory of genetic variance  
739 in the course of artificial selection. *Genetics Research* **77**: 83–94.
- 740 Sorensen, D. and D. Gianola, 2007 *Likelihood, Bayesian, and MCMC methods in quantitative*  
741 *genetics*. Springer Science & Business Media.
- 742 Sorensen, D. and B. Kennedy, 1984 Estimation of genetic variances from unselected and  
743 selected populations. *Journal of Animal Science* **59**: 1213–1223.

- 744 Strandén, I. and D. J. Garrick, 2009 Technical note: derivation of equivalent computing al-  
745 gorithms for genomic predictions and reliabilities of animal merit. *Journal of Dairy Science*  
746 **92**: 2971–2975.
- 747 Thompson, R., 2019 Desert island papers a life in variance parameter and quantitative  
748 genetic parameter estimation reviewed using 16 papers. *Journal of Animal Breeding and*  
749 *Genetics* **136**: 230–242.
- 750 Thompson, R., S. Brotherstone, and I. M. White, 2005 Estimation of quantitative genetic  
751 parameters. *Philosophical Transactions of the Royal Society B: Biological Sciences* **360**:  
752 1469–1477.
- 753 Tibshirani, R., 1996 Regression shrinkage and selection via the lasso. *Journal of the Royal*  
754 *Statistical Society: Series B (Methodological)* **58**: 267–288.
- 755 Tolhurst, D. J., K. L. Mathews, A. B. Smith, and B. R. Cullis, 2019 Genomic selection in  
756 multi-environment plant breeding trials using a factor analytic linear mixed model. *Journal*  
757 *of Animal Breeding and Genetics* **136**: 279–300.
- 758 Tsuruta, S., I. Misztal, and T. Lawlor, 2004 Genetic correlations among production, body  
759 size, udder, and productive life traits over time in holsteins. *Journal of dairy science* **87**:  
760 1457–1468.
- 761 Tusell, L., P. Pérez-Rodríguez, S. Forni, X.-L. Wu, and D. Gianola, 2013 Genome-enabled  
762 methods for predicting litter size in pigs: a comparison. *Animal* **7**: 1739–1749.
- 763 van den Berg, I., I. M. MacLeod, C. M. Reich, E. J. Breen, and J. E. Pryce, 2020 Optimizing  
764 genomic prediction for australian red dairy cattle. *Journal of Dairy Science* **103**: 6276–  
765 6298.

- 766 VanRaden, P. M., 2008 Efficient methods to compute genomic predictions. *Journal of dairy*  
767 *science* **91**: 4414–4423.
- 768 Varona, L., A. Legarra, M. A. Toro, and Z. G. Vitezica, 2018 Non-additive effects in genomic  
769 selection. *Frontiers in Genetics* **9**: 78.
- 770 Walsh, B. and M. Lynch, 2018 *Evolution and selection of quantitative traits*. OUP Oxford.
- 771 Whittaker, J. C., R. Thompson, and M. C. Denham, 2000 Marker-assisted selection using  
772 ridge regression. *Genetics Research* **75**: 249–252.
- 773 Woolliams, J., P. Berg, B. Dagnachew, and T. Meuwissen, 2015 Genetic contributions and  
774 their optimization. *Journal of Animal Breeding and Genetics* **132**: 89–99.
- 775 Wright, S., 1931 Evolution in Mendelian populations. *Genetics* **16**: 97.

## 776 Supplementary Material

Table S1: Genetic variance partitioned into genic variance and within- and between-chromosome linkage-disequilibrium (LD) covariances by chromosome for **QTL genotypes** in headrows (HDRW, year 18) and elite yield trial (EYT, year 21); the genetic variance is the sum of genic variance, within-LD and between-LD (see Fig. 2)

| Chr                           | HDRW    |                     |                    |                    | EYT     |                     |                    |                     |
|-------------------------------|---------|---------------------|--------------------|--------------------|---------|---------------------|--------------------|---------------------|
|                               | Genetic | Genic               | Within-LD          | Between-LD         | Genetic | Genic               | Within-LD          | Between-LD          |
| 1                             | 98.2    | 61.9                | 36.3               | -5.1               | 91.6    | 55.4                | 36.2               | 40.6                |
| 2                             | 49.9    | 55.3                | -5.4               | -7.4               | 65.0    | 44.5                | 20.5               | -39.2               |
| 3                             | 50.5    | 55.8                | -5.3               | -15.5              | 52.6    | 47.4                | 5.2                | -97.4               |
| 4                             | 48.0    | 52.5                | -4.5               | -7.9               | 20.6    | 51.4                | -30.8              | 14.2                |
| 5                             | 49.8    | 55.6                | -5.8               | -17.4              | 41.6    | 43.0                | -1.4               | -51.6               |
| 6                             | 55.1    | 60.4                | -5.3               | 1.8                | 45.2    | 57.2                | -12.0              | -58.6               |
| 7                             | 53.2    | 61.9                | -8.6               | 0.1                | 32.2    | 54.0                | -21.8              | 40.4                |
| 8                             | 84.6    | 47.7                | 36.9               | 7.5                | 153.0   | 43.0                | 110.0              | 153.2               |
| 9                             | 73.8    | 65.7                | 8.2                | -52.4              | 47.8    | 58.3                | -10.5              | -38.6               |
| 10                            | 65.1    | 57.5                | 7.6                | 8.0                | 104.6   | 57.2                | 47.4               | -281.4              |
| 11                            | 49.6    | 61.5                | -11.9              | -1.0               | 25.6    | 58.8                | -33.1              | -14.6               |
| 12                            | 40.9    | 62.4                | -21.5              | 4.4                | 89.8    | 51.2                | 38.6               | -82.4               |
| 13                            | 48.2    | 63.4                | -15.2              | 14.0               | 39.4    | 49.2                | -9.8               | 9.8                 |
| 14                            | 68.4    | 59.2                | 9.3                | 14.6               | 34.6    | 48.4                | -13.8              | -1.6                |
| 15                            | 50.2    | 56.8                | -6.6               | -2.2               | 55.2    | 48.2                | 7.0                | 69.6                |
| 16                            | 86.6    | 61.6                | 24.9               | -48.8              | 73.2    | 50.6                | 22.6               | -35.0               |
| 17                            | 65.0    | 58.5                | 6.6                | 29.5               | 74.0    | 55.8                | 18.2               | 134.6               |
| 18                            | 57.0    | 60.0                | -3.0               | -10.5              | 53.0    | 49.9                | 3.0                | -24.2               |
| 19                            | 54.9    | 60.7                | -5.8               | 4.7                | 37.4    | 50.0                | -12.6              | 7.0                 |
| 20                            | 29.6    | 58.2                | -28.6              | 8.9                | 36.4    | 47.0                | -10.6              | 19.0                |
| 21                            | 34.3    | 58.7                | -24.4              | -1.5               | 28.0    | 53.9                | -25.9              | -13.2               |
| Sum                           | 1213.1  | 1235.1 <sup>1</sup> | -22.0 <sup>2</sup> | -76.2 <sup>3</sup> | 1200.8  | 1074.4 <sup>1</sup> | 126.3 <sup>2</sup> | -249.4 <sup>3</sup> |
| Whole-genome <sup>1+2+3</sup> |         |                     | 1136.9             |                    |         |                     | 951.4              |                     |



Table S2: Genetic variance partitioned into genic variance and within- and between-chromosome linkage-disequilibrium (LD) covariances by chromosome for **marker genotypes** in headrows (HDRW, year 18) and elite yield trial (EYT, year 21); the genetic variance is the sum of genic variance, within-LD and between-LD (see Fig. 2)

| Chr                           | HDRW    |                     |                    |                     | EYT     |                     |                    |                    |
|-------------------------------|---------|---------------------|--------------------|---------------------|---------|---------------------|--------------------|--------------------|
|                               | Genetic | Genic               | Within-LD          | Between-LD          | Genetic | Genic               | Within-LD          | Between-LD         |
| 1                             | 286.9   | 310.2               | -23.3              | -156.1              | 151.2   | 278.7               | -127.4             | 619.1              |
| 2                             | 383.6   | 288.6               | 95.0               | -151.0              | 450.4   | 246.4               | 204.0              | 18.8               |
| 3                             | 270.1   | 289.9               | -19.8              | 44.2                | 435.2   | 257.4               | 177.8              | 829.2              |
| 4                             | 371.8   | 288.4               | 83.4               | 125.8               | 268.0   | 267.0               | 1.0                | 507.2              |
| 5                             | 317.5   | 286.2               | 31.3               | 20.6                | 117.4   | 211.1               | -93.7              | -24.0              |
| 6                             | 347.0   | 290.8               | 56.2               | 59.1                | 395.4   | 278.9               | 116.5              | 848.3              |
| 7                             | 337.1   | 311.9               | 25.2               | -172.7              | 692.8   | 289.4               | 403.4              | -1021.2            |
| 8                             | 340.5   | 274.2               | 66.4               | -243.9              | 263.8   | 221.6               | 42.2               | -1231.2            |
| 9                             | 290.1   | 302.8               | -12.6              | 11.7                | 133.6   | 285.6               | -151.9             | 242.4              |
| 10                            | 403.9   | 317.0               | 86.9               | -16.6               | 473.0   | 305.2               | 167.8              | 816.6              |
| 11                            | 192.7   | 304.2               | -111.4             | 45.9                | 48.6    | 290.2               | -241.6             | -129.7             |
| 12                            | 316.0   | 300.9               | 15.1               | -43.6               | 230.6   | 243.5               | -13.0              | -180.2             |
| 13                            | 303.6   | 294.8               | 8.8                | -175.6              | 114.6   | 245.9               | -131.4             | 416.7              |
| 14                            | 285.6   | 315.7               | -30.1              | 34.5                | 95.6    | 277.6               | -182.0             | -346.5             |
| 15                            | 221.1   | 292.8               | -71.8              | -32.2               | 319.2   | 256.8               | 62.5               | 25.1               |
| 16                            | 396.9   | 298.3               | 98.6               | -0.2                | 215.4   | 248.4               | -33.0              | 213.4              |
| 17                            | 322.9   | 301.3               | 21.7               | -24.8               | 467.4   | 283.0               | 184.3              | -1384.9            |
| 18                            | 229.8   | 290.1               | -60.3              | -32.3               | 105.2   | 245.6               | -140.5             | 532.7              |
| 19                            | 225.4   | 307.3               | -81.9              | 48.6                | 88.2    | 273.5               | -185.4             | -16.1              |
| 20                            | 404.2   | 296.3               | 107.9              | -58.4               | 234.4   | 245.7               | -11.3              | 175.2              |
| 21                            | 205.9   | 286.7               | -80.8              | -119.4              | 146.8   | 255.4               | -108.6             | 3.1                |
| Sum                           | 6452.6  | 6248.3 <sup>1</sup> | 204.3 <sup>2</sup> | -836.7 <sup>3</sup> | 5446.8  | 5507.0 <sup>1</sup> | -60.2 <sup>2</sup> | 914.1 <sup>3</sup> |
| Whole-genome <sup>1+2+3</sup> | 5615.9  |                     |                    | 6360.8              |         |                     |                    |                    |

Table S3: Genetic variance partitioned into genic variance and within- and between-chromosome linkage-disequilibrium (LD) covariances by chromosome for **true genetic values** in headrows (HDRW, year 18) and elite yield trial (EYT, year 21); the genetic variance is the sum of genic variance, within-LD and between-LD (see Fig. 2)

| Chr                           | HDRW    |                     |                      |                      | EYT     |                     |                     |                      |
|-------------------------------|---------|---------------------|----------------------|----------------------|---------|---------------------|---------------------|----------------------|
|                               | Genetic | Genic               | Within-LD            | Between-LD           | Genetic | Genic               | Within-LD           | Between-LD           |
| 1                             | 0.0036  | 0.0039              | -0.0003              | -0.0010              | 0.0014  | 0.0031              | -0.0017             | -0.0056              |
| 2                             | 0.0047  | 0.0046              | 0.0001               | -0.0020              | 0.0030  | 0.0033              | -0.0003             | -0.0021              |
| 3                             | 0.0035  | 0.0042              | -0.0007              | 0.0011               | 0.0014  | 0.0040              | -0.0027             | 0.0028               |
| 4                             | 0.0029  | 0.0039              | -0.0010              | -0.0002              | 0.0030  | 0.0036              | -0.0005             | 0.0017               |
| 5                             | 0.0050  | 0.0037              | 0.0013               | -0.0008              | 0.0040  | 0.0027              | 0.0013              | 0.0004               |
| 6                             | 0.0030  | 0.0026              | 0.0004               | -0.0017              | 0.0016  | 0.0025              | -0.0009             | 0.0004               |
| 7                             | 0.0041  | 0.0041              | 0.0000               | 0.0002               | 0.0042  | 0.0035              | 0.0008              | -0.0002              |
| 8                             | 0.0023  | 0.0035              | -0.0012              | -0.0006              | 0.0031  | 0.0036              | -0.0005             | 0.0021               |
| 9                             | 0.0044  | 0.0043              | 0.0001               | -0.0002              | 0.0042  | 0.0038              | 0.0004              | -0.0040              |
| 10                            | 0.0025  | 0.0033              | -0.0008              | -0.0003              | 0.0045  | 0.0033              | 0.0013              | -0.0075              |
| 11                            | 0.0023  | 0.0037              | -0.0014              | 0.0004               | 0.0016  | 0.0035              | -0.0019             | -0.0052              |
| 12                            | 0.0054  | 0.0043              | 0.0010               | 0.0000               | 0.0048  | 0.0036              | 0.0012              | -0.0031              |
| 13                            | 0.0056  | 0.0037              | 0.0019               | -0.0005              | 0.0076  | 0.0028              | 0.0048              | -0.0087              |
| 14                            | 0.0026  | 0.0045              | -0.0019              | -0.0004              | 0.0037  | 0.0039              | -0.0002             | -0.0084              |
| 15                            | 0.0044  | 0.0034              | 0.0010               | -0.0004              | 0.0035  | 0.0034              | 0.0001              | 0.0001               |
| 16                            | 0.0058  | 0.0053              | 0.0005               | -0.0027              | 0.0082  | 0.0042              | 0.0040              | -0.0075              |
| 17                            | 0.0060  | 0.0051              | 0.0009               | -0.0019              | 0.0075  | 0.0052              | 0.0022              | 0.0008               |
| 18                            | 0.0038  | 0.0042              | -0.0004              | 0.0010               | 0.0034  | 0.0032              | 0.0002              | 0.0003               |
| 19                            | 0.0039  | 0.0038              | 0.0001               | -0.0020              | 0.0022  | 0.0030              | -0.0007             | 0.0038               |
| 20                            | 0.0033  | 0.0036              | -0.0003              | 0.0002               | 0.0009  | 0.0026              | -0.0017             | -0.0007              |
| 21                            | 0.0030  | 0.0037              | -0.0007              | -0.0006              | 0.0017  | 0.0033              | -0.0016             | 0.0019               |
| Sum                           | 0.0820  | 0.0833 <sup>1</sup> | -0.0013 <sup>2</sup> | -0.0124 <sup>3</sup> | 0.0756  | 0.0721 <sup>1</sup> | 0.0035 <sup>2</sup> | -0.0387 <sup>3</sup> |
| Whole-genome <sup>1+2+3</sup> |         |                     | 0.0696               |                      |         |                     | 0.0369              |                      |

Table S4: Genetic variance partitioned into genic variance and within- and between-chromosome linkage-disequilibrium (LD) covariances by chromosome for **estimated genetic values** (with the full Bayesian approach) in headrows (HDRW, year 18) and elite yield trial (EYT, year 21); the genetic variance is the sum of genic variance, within-LD and between-LD (see Fig. 2)

| Chr                           | HDRW    |                     |                      |                      | EYT     |                     |                      |                      |
|-------------------------------|---------|---------------------|----------------------|----------------------|---------|---------------------|----------------------|----------------------|
|                               | Genetic | Genic               | Within-LD            | Between-LD           | Genetic | Genic               | Within-LD            | Between-LD           |
| 1                             | 0.0037  | 0.0041              | -0.0004              | 0.0003               | 0.0041  | 0.0037              | 0.0004               | -0.0029              |
| 2                             | 0.0034  | 0.0038              | -0.0004              | 0.0005               | 0.0031  | 0.0033              | -0.0002              | -0.0009              |
| 3                             | 0.0044  | 0.0039              | 0.0005               | 0.0012               | 0.0040  | 0.0035              | 0.0005               | -0.0006              |
| 4                             | 0.0033  | 0.0038              | -0.0005              | -0.0007              | 0.0035  | 0.0035              | -0.0001              | -0.0029              |
| 5                             | 0.0044  | 0.0039              | 0.0005               | -0.0004              | 0.0030  | 0.0028              | 0.0001               | -0.0024              |
| 6                             | 0.0037  | 0.0039              | -0.0002              | -0.0011              | 0.0027  | 0.0037              | -0.0010              | -0.0009              |
| 7                             | 0.0037  | 0.0042              | -0.0005              | -0.0005              | 0.0027  | 0.0039              | -0.0011              | -0.0016              |
| 8                             | 0.0031  | 0.0037              | -0.0006              | -0.0004              | 0.0023  | 0.0030              | -0.0007              | -0.0011              |
| 9                             | 0.0039  | 0.0040              | -0.0001              | 0.0004               | 0.0038  | 0.0038              | 0.0000               | -0.0021              |
| 10                            | 0.0037  | 0.0042              | -0.0005              | 0.0000               | 0.0030  | 0.0041              | -0.0011              | -0.0018              |
| 11                            | 0.0037  | 0.0040              | -0.0003              | 0.0001               | 0.0040  | 0.0039              | 0.0002               | -0.0031              |
| 12                            | 0.0041  | 0.0041              | 0.0000               | -0.0005              | 0.0038  | 0.0033              | 0.0004               | -0.0025              |
| 13                            | 0.0045  | 0.0040              | 0.0005               | 0.0008               | 0.0028  | 0.0033              | -0.0005              | -0.0011              |
| 14                            | 0.0033  | 0.0042              | -0.0009              | -0.0005              | 0.0024  | 0.0037              | -0.0012              | -0.0011              |
| 15                            | 0.0037  | 0.0039              | -0.0002              | -0.0010              | 0.0023  | 0.0034              | -0.0011              | -0.0008              |
| 16                            | 0.0040  | 0.0040              | 0.0000               | -0.0012              | 0.0031  | 0.0033              | -0.0002              | -0.0027              |
| 17                            | 0.0040  | 0.0041              | -0.0001              | 0.0003               | 0.0034  | 0.0038              | -0.0004              | -0.0017              |
| 18                            | 0.0035  | 0.0039              | -0.0003              | -0.0004              | 0.0025  | 0.0033              | -0.0008              | -0.0007              |
| 19                            | 0.0038  | 0.0041              | -0.0003              | -0.0004              | 0.0030  | 0.0037              | -0.0007              | -0.0006              |
| 20                            | 0.0038  | 0.0040              | -0.0002              | 0.0005               | 0.0031  | 0.0033              | -0.0002              | -0.0022              |
| 21                            | 0.0034  | 0.0038              | -0.0004              | -0.0006              | 0.0030  | 0.0034              | -0.0004              | -0.0010              |
| Sum                           | 0.0791  | 0.0836 <sup>1</sup> | -0.0045 <sup>2</sup> | -0.0037 <sup>3</sup> | 0.0655  | 0.0736 <sup>1</sup> | -0.0081 <sup>2</sup> | -0.0348 <sup>3</sup> |
| Whole-genome <sup>1+2+3</sup> |         |                     | 0.0754               |                      |         |                     | 0.0307               |                      |

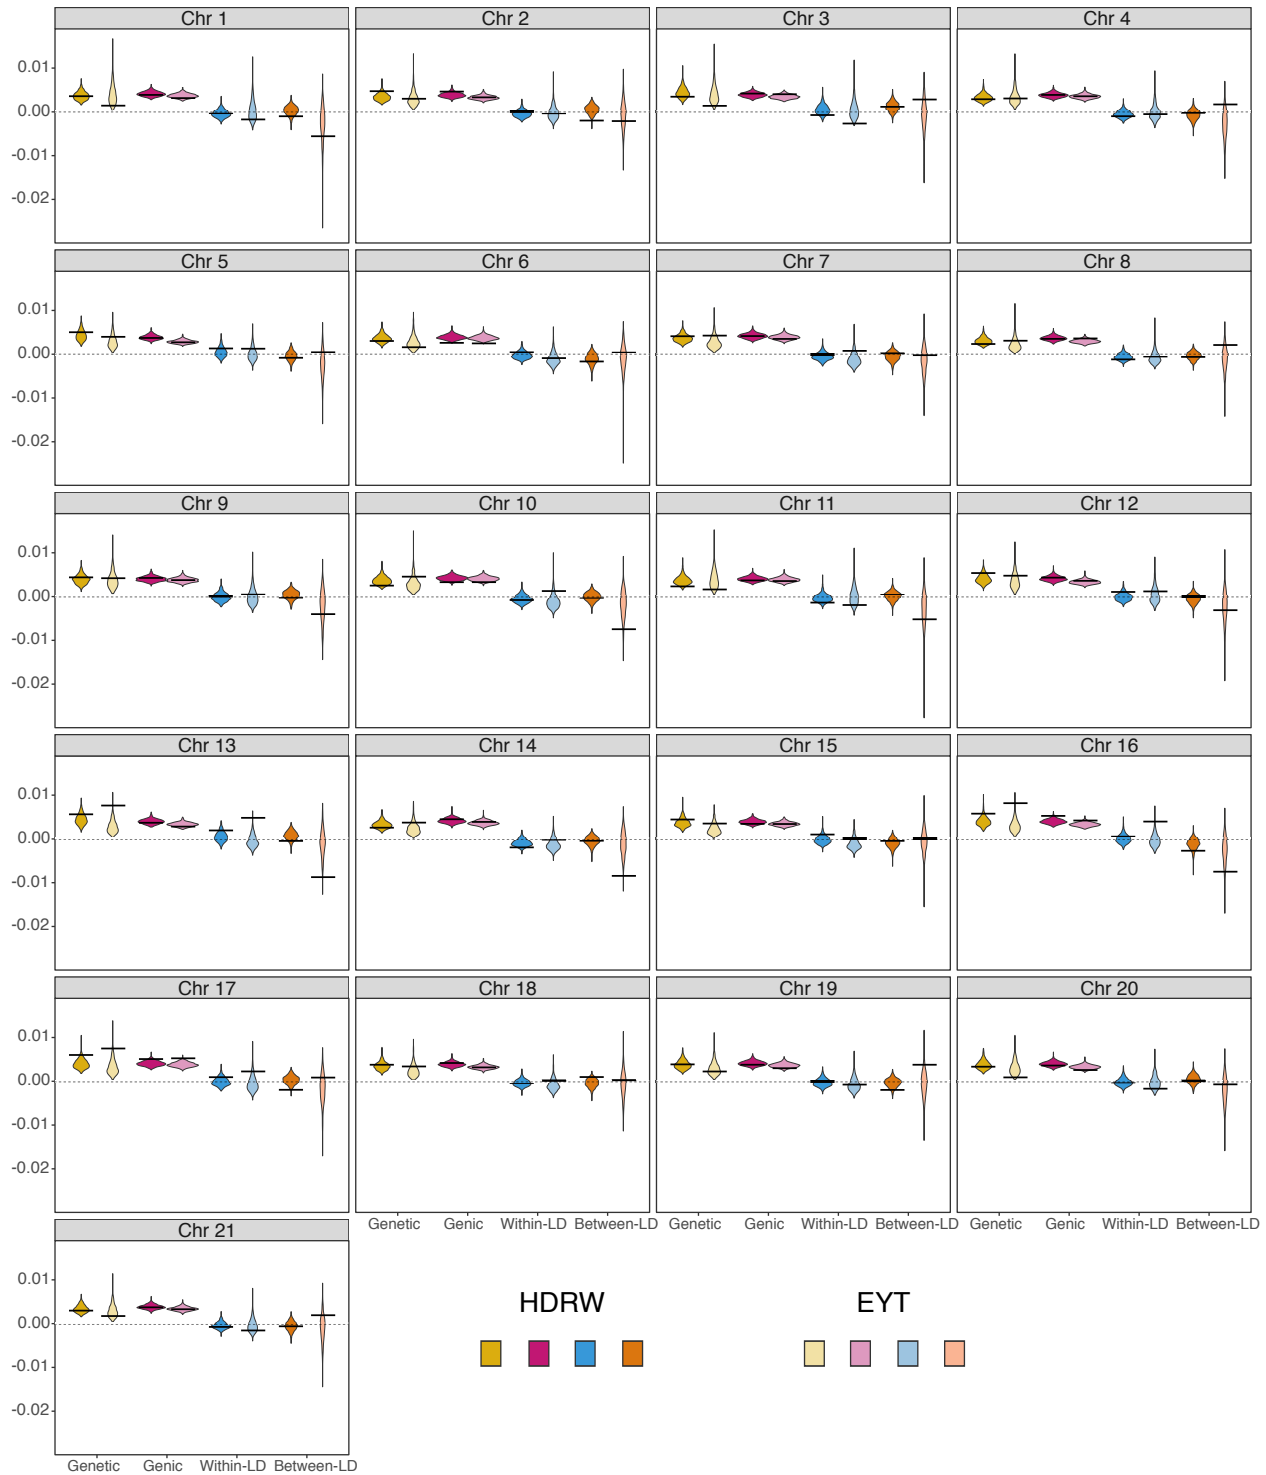

Figure S1: Genetic and genic variances, and within- and between-chromosome linkage disequilibrium (LD) covariances by chromosome with the full Bayesian approach for headrows (HDRW, year 18) and elite yield trial (EYT, year 21) (see Fig. 2); black lines denote true values and violins depict posterior distributions

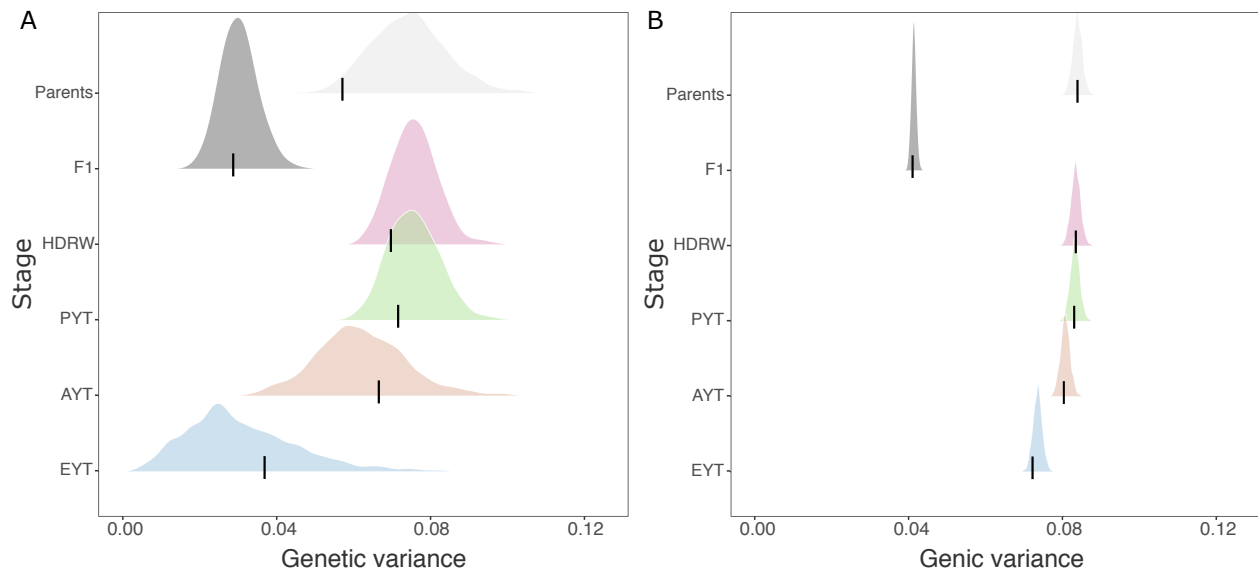

Figure S2: Genetic (A) and genic (B) variance estimated with the empirical Bayesian approach for parents in year 16,  $F_1$  progeny (F1) in year 17, headrows (HDRW) in year 18, preliminary yield trial (PYT) in year 19, advanced yield trial (AYT) in year 20, and elite yield trial (EYT) in year 21; black lines denote the true values and densities depict posterior distributions

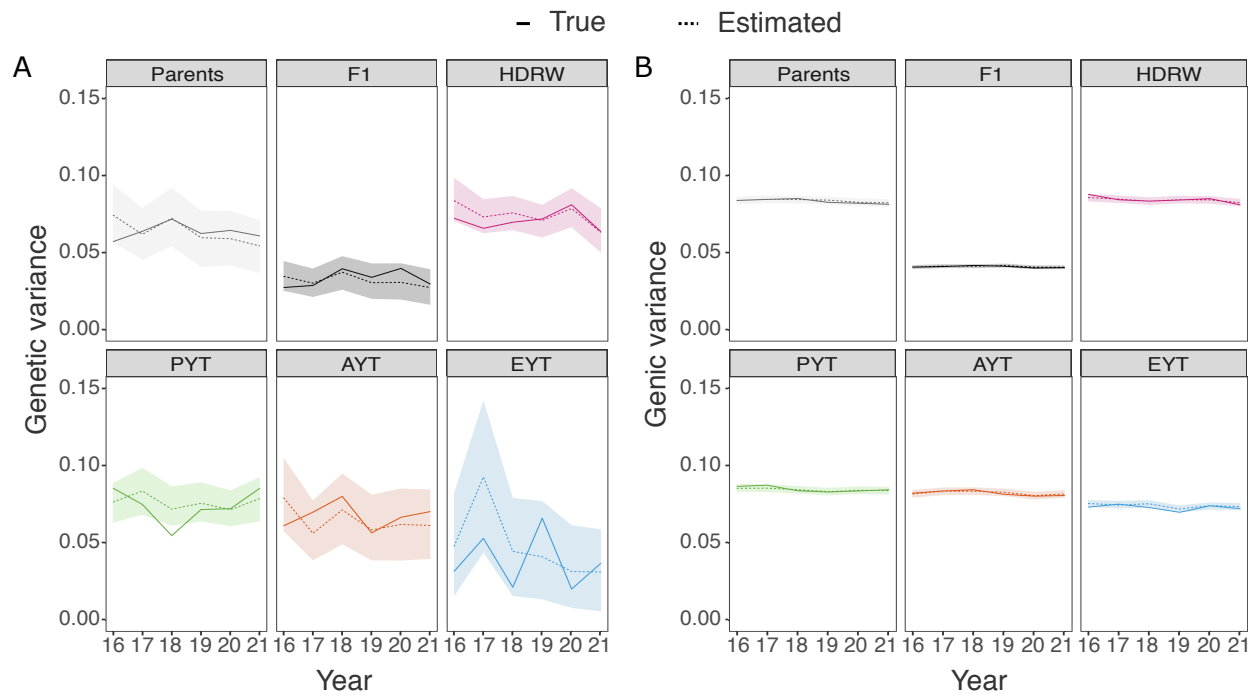

Figure S3: Temporal trend in genetic (A) and genic (B) variance estimated with the empirical Bayesian approach for parents,  $F_1$  progeny (F1), headrows (HDRW), preliminary yield trial (PYT), advanced yield trial (AYT), and elite yield trial (EYT); solid lines denote the true value, dashed lines denote posterior means and polygons depict 95% posterior quantiles
